1

2 **Manuscript title:**

3 The V-type H<sup>+</sup>-ATPase is targeted in anti-diuretic hormone control of the  
4 Malpighian ‘renal’ tubules

5

6 Farwa Sajadi<sup>1</sup>, María Fernanda Vergara-Martínez<sup>1,2</sup> and Jean-Paul V. Paluzzi<sup>1\*</sup>

7

1. Department of Biology, York University, 4700 Keele Street, Toronto, Ontario, M3J 1P3, Canada.

8

2. Departamento de Biología Celular y Fisiología, Instituto de Investigaciones Biomédicas, Universidad

9

Nacional Autónoma de México, Mexico City, Mexico.

10

\*Corresponding author: Jean-Paul V. Paluzzi

11

**Email:** [paluzzi@yorku.ca](mailto:paluzzi@yorku.ca)

12

13

14

15

16

17

18

**Author Contributions:** J.-P.P. and F.S. designed research; F.S. and M.F.V. performed research; F.S. and J.P.P. analyzed data; and J.-P.P. and F.S. wrote the manuscript.

19

20

**Competing Interest Statement:** The authors declare no competing interest.

21

**Classification:** Biological Sciences; Physiology

22

**Keywords:** excretory system, *Aedes aegypti*, mosquito, anti-diuresis, proton pump, disease vector

23

24

**This PDF file includes:**

25

Main Text

26

Figures 1 to 6; S1 to S7

27

28

29 **Abstract**

30 Like other insects, secretion by mosquito Malpighian tubules (MTs) is driven by the V-  
31 type H<sup>+</sup>-ATPase (VA) localized in the apical membrane of principal cells. The anti-  
32 diuretic neurohormone CAPA inhibits secretion by MTs stimulated by select diuretic  
33 hormones; however, the cellular effectors of this inhibitory signaling cascade remain  
34 unclear. Herein, we demonstrate that the VA inhibitor bafilomycin selectively inhibits  
35 serotonin (5HT)- and calcitonin-related diuretic hormone (DH<sub>31</sub>)-stimulated secretion.  
36 VA activity increases in DH<sub>31</sub>-treated MTs, whereas CAPA abolishes this increase  
37 through a NOS/cGMP/PKG signaling pathway. A critical feature of VA activation  
38 involves the reversible association of the cytosolic (V<sub>1</sub>) and membrane (V<sub>o</sub>) complexes.  
39 Indeed, higher V<sub>1</sub> protein abundance was found in membrane fractions of DH<sub>31</sub>-treated  
40 MTs whereas CAPA significantly decreased V<sub>1</sub> abundance in membrane fractions while  
41 increasing it in cytosolic fractions. Immunolocalization of V<sub>1</sub> was observed strictly in the  
42 apical membrane of MTs treated with DH<sub>31</sub> alone whereas immunoreactivity was  
43 dispersed following CAPA treatment. VA complexes colocalized apically in female MTs  
44 shortly after a blood-meal consistent with the peak and post-peak phases of diuresis.  
45 Comparatively, V<sub>1</sub> immunoreactivity in MTs was more dispersed and did not colocalize  
46 with the V<sub>o</sub> complex in the apical membrane at 3 hours post blood-meal, representing a  
47 timepoint after the late phase of diuresis has concluded. Therefore, CAPA inhibition of  
48 MTs involves reducing VA activity and promotes complex dissociation hindering  
49 secretion. Collectively, these findings reveal a key target in hormone-mediated inhibition  
50 of MTs countering diuresis that provides a deeper understanding of this critical  
51 physiological process necessary for hydromineral balance.

52

## 53 **Significance Statement**

54 The V-type H<sup>+</sup> ATPase (VA), also known as the proton pump, provides the driving force  
55 for transepithelial ion and fluid secretion in insect Malpighian tubules (MTs). While  
56 studies have shown that diuretic stimulation activates various signaling pathways  
57 promoting increased VA activity, our understanding of anti-diuretic signaling and its  
58 potential regulation of the VA remains rudimentary. Here we show that a CAPA  
59 neuropeptide acts through the NOS/cGMP/PKG pathway to inhibit VA activity,  
60 supporting the notion that the anti-diuretic regulation is achieved by promoting  
61 dissociation of the VA complexes. These results demonstrate a critical role of VA  
62 inhibition and trafficking necessary for anti-diuretic signaling and advances our  
63 understanding of the complex neuroendocrine control of the MTs in this important human  
64 disease-vector mosquito.

65

## 66 **Main Text**

### 67 **Introduction**

68 Insect post-prandial diuresis is under rigorous control by neuroendocrine factors  
69 (1) acting on the Malpighian ‘renal’ tubules (MTs) to regulate primary urine production.  
70 In the yellow fever mosquito, *Aedes aegypti*, several diuretics have been identified that  
71 regulate urine production including serotonin (5HT), calcitonin-related diuretic hormone  
72 (DH<sub>31</sub>), corticotropin-releasing factor-related diuretic hormone (DH<sub>44</sub>) and leucokinin-  
73 related (LK) diuretic hormone (2–5). An anti-diuretic peptidergic neurohormone, CAPA,  
74 selectively inhibits DH<sub>31</sub>- and 5HT-stimulated secretion of MTs (4, 6, 7). Insect CAPA

75 neuropeptides are produced in the central nervous system and are evolutionarily related to  
76 the vertebrate neuromedin U peptides (8). In *Drosophila melanogaster*, CAPA peptides  
77 have been shown to act through a conserved nitridergic signaling pathway to stimulate  
78 diuresis by MTs (9, 10); however, a few other studies have alluded to an anti-diuretic role  
79 (11, 12). In contrast, in both larval and adult *A. aegypti*, CAPA peptides inhibit fluid  
80 secretion through a signaling cascade involving the NOS/cGMP/PKG pathway (6, 7).  
81 Despite this, the anti-diuretic signaling mechanism and downstream cellular targets, such  
82 as the ion channels and transporters, remain elusive.

83         In insect MTs, including *A. aegypti*, the bafilomycin-sensitive V-type H<sup>+</sup> ATPase  
84 (VA), also known as the proton pump, functions as an electrogenic pump allowing the  
85 transport of protons from the cytoplasm to the tubule lumen, thus generating a cell-  
86 negative membrane voltage (13, 14). This membrane voltage can then drive secondary  
87 transport processes such as the cation/H<sup>+</sup> exchanger or anion/H<sup>+</sup> cotransporter (15, 16).  
88 Originally found in vacuolar membranes of animals and plants, the VA has since been  
89 found to be essential in cell function in both invertebrates and vertebrates (17). In insects,  
90 the VA is densely located in the apical brush border membrane of tubule principal cells  
91 (13, 18), which is rich in mitochondria and endoplasmic reticula, fueling the ATP-  
92 consuming proton pump (1, 19). Previous studies have shown VA localization within the  
93 apical membrane of principal cells along the entire length of the MTs (19), but absent in  
94 stellate cells that express relatively higher levels of the P-type Na<sup>+</sup>/K<sup>+</sup> ATPase (NKA)  
95 (19). Due to stronger VA immunoreactivity observed in MTs (19), and greater ATPase  
96 activity by electrophysiological assays (13, 14), the VA is categorized as serving mainly,  
97 but not exclusively (20), stimulated transport mechanisms, whereas the NKA serves basic

98 cell housekeeping functions when MTs are undergoing low unstimulated rates of  
99 secretion (13, 20, 21).

100 Stimulation of distinct diuretic hormone receptors can activate various signaling  
101 pathways, including elevation of cyclic AMP (cAMP) levels which is known to increase  
102 VA activity and assembly in insects (22). In *A. aegypti*, DH<sub>31</sub>, identified as the mosquito  
103 natriuretic peptide (23), selectively activates transepithelial secretion of Na<sup>+</sup> in the MTs,  
104 using cAMP as a second messenger (1), and upregulating the VA function to stimulate  
105 fluid secretion (24). Similarly, 5HT-stimulated diuresis is also thought to be mediated (at  
106 least in part) through the cAMP second messenger pathway (25), activating protein  
107 kinase A (PKA) to increase the transepithelial voltage of the basolateral membrane in  
108 tubule principal cells (1, 26). In contrast, DH<sub>44</sub> has been shown to initiate diuresis via the  
109 paracellular and transcellular pathways, with higher nanomolar concentrations increasing  
110 cAMP and Ca<sup>2+</sup>, influencing both paracellular and transcellular transport, and lower  
111 nanomolar concentrations acting through the paracellular pathway only, via intracellular  
112 Ca<sup>2+</sup> (27). Thus, due to its predominant role in fluid secretion, the VA could be a likely  
113 target for both diuretic and anti-diuretic factors.

114 Eukaryotic V-ATPases are a multi-subunit protein composed of up to 14 different  
115 polypeptides, which form two major structural complexes. The peripheral V<sub>1</sub> complex  
116 (400-600 kDa), is invariably present in the cytoplasm and interacts with ATP, ADP, and  
117 inorganic phosphate (28). The cytosolic V<sub>1</sub> complex consists of eight different subunits  
118 (A-H): a globular headpiece with three alternating subunits A and B forming a hexamer  
119 with nucleotide binding sites located at their interface, a central rotor stalk with single  
120 copies of subunits D and F, and lastly, a peripheral stalk made up of subunits C, E, G, and

121 H (28). The B subunit, shown to have high sequence similarity amongst several species  
122 from fungi to mammals (29, 30), is a 56 kDa polypeptide, and is one of the two sites  
123 (along with subunit A) (31) in the  $V_1$  complex that binds ATP. In contrast, the  
124 membrane-integrated  $V_o$  complex (150-350 kDa) mediates the transport of  $H^+$  across the  
125 membrane (28) and is composed of at least six different subunits, which collectively  
126 function in the proton translocation pathway (13, 28). Although the proton channel of the  
127 VA can be blocked pharmacologically by the macrolide antibiotic, bafilomycin (32),  
128 there are two known intrinsic mechanisms for VA regulation: firstly, through oxidation of  
129 the cystine residue on the A subunit of the  $V_1$  complex, thus preventing ATP hydrolysis;  
130 secondly, through reversible disassembly of the  $V_1$  complex from the holoenzyme (13,  
131 33). While the role and regulation of the VA by diuretic hormones in insect MTs has  
132 been studied (34–36), research examining anti-diuretic signaling mechanisms involving  
133 the VA remain in their infancy.

134 This study aimed to identify the cellular targets necessary for CAPA-mediated  
135 inhibition of fluid secretion by MTs stimulated by select diuretic factors in adult female  
136 *A. aegypti*. Our results provide evidence that CAPA neuropeptides inhibit fluid secretion  
137 by VA complex dissociation, thus hindering VA function and activity that is essential for  
138 driving rapid post-prandial diuresis.

139

## 140 **Results**

141 **Bafilomycin inhibits  $DH_{31}$ - and 5HT-stimulated fluid secretion rate.** To determine the  
142 appropriate concentration of bafilomycin to test on adult *A. aegypti* MTs, several doses  
143 were applied against  $DH_{31}$ -stimulated tubules (Fig. S1). Higher doses of bafilomycin ( $10^{-$

144  $4 \text{ M}$  and  $10^{-5} \text{ M}$ ) resulted in significant inhibition of fluid secretion rate, with maximal  
145 inhibition leading to a five-fold decrease, observed with treatment of  $10^{-5} \text{ M}$  bafilomycin.  
146 Next, to determine whether inhibiting the VA would decrease fluid secretion rate  
147 stimulated by other diuretic hormones, including 5HT and  $\text{DH}_{44}$ , the effect of  $10^{-5} \text{ M}$   
148 bafilomycin on adult tubules stimulated with these diuretics was tested (Fig. 1). Fluid  
149 secretion rates were measured over 30 min under control (stimulated) conditions, and  
150 then at 10-min intervals in the presence of bafilomycin. Treatment of MTs with  $10^{-5} \text{ M}$   
151 bafilomycin against  $\text{DH}_{31}$  led to a decrease of fluid secretion over the treatment interval.  
152 Specifically, 30 min after treatment with bafilomycin, fluid secretion rate was  
153 significantly reduced by over two-fold to  $0.438 \pm 0.041 \text{ nL min}^{-1}$ , compared to  $\text{DH}_{31}$  alone,  
154  $0.941 \pm 0.077 \text{ nL min}^{-1}$  (Fig. 1A). Similar results were seen with 5HT-stimulated MTs;  
155 however, a decrease in fluid secretion was observed 30 min post-bafilomycin, with a  
156 significant inhibition 40 min after treatment ( $0.522 \pm 0.072 \text{ nL min}^{-1}$ , 5HT alone vs.  
157  $0.182 \pm 0.045 \text{ nL min}^{-1}$ , 5HT + bafilomycin) (Fig. 1B). Distinct from  $\text{DH}_{31}$  and 5HT-  
158 stimulated tubules,  $\text{DH}_{44}$ -stimulated secretion was insensitive to bafilomycin treatment  
159 (Fig. 1C). To confirm whether *Aedae*CAPA-1 anti-diuresis is mediated by VA inhibition,  
160 adult female MTs were treated with either  $\text{DH}_{31}$  alone or in combination with  
161 *Aedae*CAPA-1, bafilomycin, or both (Fig. 1D). MTs treated with either *Aedae*CAPA-1 or  
162 bafilomycin resulted in a significant inhibition of  $\text{DH}_{31}$ -stimulated secretion, and similar  
163 inhibition was observed when both *Aedae*CAPA-1 and bafilomycin were applied together  
164 with no evidence of any additive inhibitory effects (Fig. 1D).

165

166 ***Aedae*CAPA-1 and bafilomycin alkalizes secreted fluid in DH<sub>31</sub>- and 5HT-**  
167 **stimulated MTs.** The VA pumps protons from the cell into the tubule lumen thus  
168 generating an electromotive potential (20, 31) and providing energy to drive the secretion  
169 of cations via Na<sup>+</sup>/H<sup>+</sup> and/or K<sup>+</sup>/H<sup>+</sup> antiporters (13). An indirect way to measure whether  
170 *Aedae*CAPA-1 and bafilomycin inhibits VA activity involves measuring the pH of the  
171 secreted fluid from diuretic-stimulated MTs treated with *Aedae*CAPA-1 or bafilomycin  
172 (Fig. 1E-G). In DH<sub>31</sub>-stimulated MTs treated with *Aedae*CAPA-1, there was an  
173 immediate significantly higher pH in the secreted fluid (7.479±0.030) at 40 min relative  
174 to control, increasing up to 7.73±0.038 at 60 min (Fig. 1E). Similarly, pH levels in DH<sub>31</sub>-  
175 stimulated MTs treated with bafilomycin were significantly higher (7.66±0.064) relative  
176 to control at 40 min, increasing up to 7.855±0.074 at 60 min. Comparable to DH<sub>31</sub>,  
177 addition of *Aedae*CAPA-1 or bafilomycin, significantly increased the pH of secreted fluid  
178 from 5HT-stimulated MTs to 7.75±0.061 and 7.82±0.083 respectively, at the 60 min  
179 mark (Fig. 1F). In contrast, unlike the effects observed with DH<sub>31</sub>- and 5HT-stimulated  
180 MTs, *Aedae*CAPA-1 or bafilomycin did not alter the pH of the secreted fluid in DH<sub>44</sub>-  
181 stimulated MTs (Fig. 1G). The pH increased from 7.4 to 7.9 during the 30-min DH<sub>44</sub>-  
182 incubation; however, pH did not change following the addition of *Aedae*CAPA-1 or  
183 bafilomycin. Separately, we conducted measurements in unstimulated tubules to verify  
184 pH in these small droplets did not drift over a time frame consistent with our above  
185 experiments. Unstimulated MTs were allowed to secrete, and the droplets were isolated  
186 and their pH was measured over the course of 60 min. Over this incubation period, no  
187 change was observed in the pH of secreted droplets from unstimulated MTs (Fig. 1H),  
188 upholding the notion that the alkalization of secreted fluid observed following



189 *Aedae*CAPA-1 (or bafilomycin) treatment of DH<sub>31</sub>- and 5HT-stimulated MTs is a result  
190 of VA inhibition. Additionally, unstimulated MTs treated with either *Aedae*CAPA-1 or  
191 bafilomycin resulted in no significant changes in either secretion rate (Fig. S2A) or pH  
192 (Fig. S2B).

193

194 ***Aedae*CAPA-1 increases cGMP and decreases cAMP levels in DH<sub>31</sub>-treated MTs.** To  
195 further clarify the CAPA signaling pathway involving the second messengers, cGMP and  
196 cAMP, we sought to determine changes in levels of these cyclic nucleotides in MTs  
197 incubated in DH<sub>31</sub> alone or combined with *Aedae*CAPA-1. Treatment of MTs with DH<sub>31</sub>  
198 alone had basal levels of cGMP,  $10.91 \pm 0.109$  pmol<sup>-1</sup>/tubule, comparable to saline treated  
199 MTs. Treatment of MTs with *Aedae*CAPA-1 resulted in a significant increase in cGMP  
200 levels compared to DH<sub>31</sub>- incubated tubules, increasing to  $11.39 \pm 0.101$  pmol<sup>-1</sup>/tubule  
201 (Fig. 1I). Similar results were observed with MTs treated with both DH<sub>31</sub> + *Aedae*CAPA-  
202 1, with significantly increased cGMP levels of  $11.39 \pm 0.123$  pmol<sup>-1</sup>/tubule (Fig. 1I)  
203 compared to MTs treated with DH<sub>31</sub> alone. In contrast, treatment of MTs with DH<sub>31</sub> alone  
204 led to significantly higher levels of cAMP,  $9.153 \pm 0.039$  pmol<sup>-1</sup>/tubule, while baseline  
205 levels of this second messenger were observed in saline, DH<sub>31</sub> + *Aedae*CAPA-1, and  
206 *Aedae*CAPA-1 treated tubules (Fig. 1J). To further confirm the stimulatory role of cAMP  
207 and inhibitory role of cGMP, tubules were treated with either cyclic nucleotide alone and  
208 secretion rates were measured (Fig. 1K). Unstimulated fluid secretion rates were  
209 measured over the first 30 min, and then at 10-min intervals with either cAMP or cGMP.  
210 Treatment of MTs with  $10^{-4}$  M cAMP led to a significant increase over the treatment  
211 interval, with fluid secretion rates increasing to  $0.615 \pm 0.096$  nL min<sup>-1</sup> at 60 min,

212 compared to  $10^{-8}$  M cGMP ( $0.052 \pm 0.091$  nL min<sup>-1</sup>) and unstimulated ( $0.065 \pm 0.091$  nL  
213 min<sup>-1</sup>) (Fig. 1K). Finally, to establish whether these cyclic nucleotide second messengers  
214 elicit antagonistic control of the MTs in adult *A. aegypti*, tubules were treated initially  
215 with cAMP over the first 30 min and then cGMP was added in the presence of cAMP for  
216 a subsequent 30 min (Fig. 1L). Similarly, we also tested the opposite treatment regime  
217 where MTs were treated initially with cGMP and subsequently with cAMP added along  
218 with cGMP. Treatment of cAMP-stimulated MTs with  $10^{-8}$  M cGMP led to a significant  
219 decrease (~4-fold) over the treatment interval, with secretion rates decreasing to  
220  $0.231 \pm 0.113$  nL min<sup>-1</sup> at 60 min, compared to  $10^{-4}$  M cAMP alone ( $0.931 \pm 0.134$  nL min<sup>-1</sup>).  
221 In contrast, cGMP-incubated tubules treated with  $10^{-4}$  M cAMP led to a significant  
222 increase (~10-fold) in secretion rate ( $0.537 \pm 0.072$  nL min<sup>-1</sup>) compared to MTs treated  
223 with  $10^{-8}$  M cGMP alone ( $0.045 \pm 0.018$  nL min<sup>-1</sup>).

224 Parallel studies examining cAMP levels were measured in DH<sub>44</sub>-incubated MTs.  
225 Treatment of MTs with DH<sub>44</sub> alone had high levels of cAMP,  $9.115 \pm 0.061$  pmol<sup>-1</sup>  
226 /tubule, compared to saline treated MTs,  $8.709 \pm 0.081$  pmol<sup>-1</sup>/tubule (Fig. S3A). Levels  
227 of cAMP remained unchanged in tubules treated with both DH<sub>44</sub> + *Aedae*CAPA-1,  
228  $8.954 \pm 0.108$  pmol<sup>-1</sup>/tubule. To further resolve the cAMP signaling pathway downstream  
229 of DH<sub>31</sub> and DH<sub>44</sub> stimulated diuresis, a PKA inhibitor (KT5720) was tested against  
230 diuretic-stimulated MTs. KT5720 abolished the stimulatory effect of DH<sub>31</sub>, whereas  
231 secretion by DH<sub>44</sub>-treated MTs remained unchanged (Fig. S3B).

232

233 ***Aedae*CAPA-1 decreases VA activity in DH<sub>31</sub>-stimulated MTs through the**  
234 **NOS/cGMP/PKG pathway.** In *Aedes* MTs, 50-60% of the total ATPase activity can be

235 attributed to a bafilomycin- and nitrate-sensitive component that reflects the activity of  
236 the VA pump (13). The remaining ATPase activity may be due to nucleotide cyclases,  
237 protein kinases, myosin, DNA helicases, and other ATP-consuming processes such as the  
238 NKA (13). As such, to determine whether CAPA inhibits VA and/or NKA function,  
239 female diuretic-stimulated MTs were challenged with *Aedae*CAPA-1 to measure the  
240 resultant NKA and VA activity. As expected, given its role as the natriuretic diuretic  
241 hormone, adult female MTs treated with DH<sub>31</sub> resulted in a significant (> two-fold)  
242 increase of VA activity, 0.0329±0.0007 μmoles ADP/μg protein/hour, compared to saline  
243 controls, 0.0151±0.0021 μmoles ADP/μg protein/hour (Fig. 2A). Importantly, MTs  
244 incubated with both DH<sub>31</sub> and *Aedae*CAPA-1 had significantly lower VA activity,  
245 resulting in activity levels indistinguishable from saline controls. In contrast, neither 5HT  
246 nor DH<sub>44</sub> influenced VA activity (p>0.05) when compared with saline controls, while co-  
247 treatment with *Aedae*CAPA-1 also resulted in indistinguishable VA activity. Similar VA  
248 activity levels were observed between 5HT and DH<sub>44</sub> (0.0255±0.0078 and 0.0208±0.0042  
249 μmoles ADP/μg protein/hour) and with co-application of *Aedae*CAPA-1 (0.0150±0.0036  
250 and 0.0154±0.0070 μmoles ADP/μg protein/hour). Unlike changes observed in VA  
251 activity following treatment with DH<sub>31</sub>, diuretic-stimulation or *Aedae*CAPA-1 treatment  
252 did not perturb NKA activity, with levels similar to that of unstimulated MTs (Fig. 2B).

253 To confirm the actions of CAPA are mediated through the NOS/cGMP/PKG  
254 pathway, pharmacological blockers, including inhibitors of NOS (*L*-NAME) and PKG  
255 (KT5823), were tested against DH<sub>31</sub>-stimulated MTs treated with either *Aedae*CAPA-1 or  
256 cGMP (Fig. 2C). Application of *L*-NAME or KT5823 abolished the inhibitory effect of  
257 *Aedae*CAPA-1, resulting in high levels of VA activity, 0.02671±0.0025 and

258 0.03653±0.0051 μmoles ADP/μg protein/hour respectively, compared to MTs treated  
259 with DH<sub>31</sub> + *Aedae*CAPA-1. As expected, treatment of DH<sub>31</sub>-stimulated MTs with cGMP  
260 resulted in a significant decrease in VA activity, 0.006±0.0026 μmoles ADP/μg  
261 protein/hour, similar to *Aedae*CAPA-1-treated MTs, while co-treatment with KT5823,  
262 abolished the inhibitory effect of cGMP, resulting in an increase in VA activity.

263

264 ***Aedae*CAPA-1 leads to VA holoenzyme dissociation in DH<sub>31</sub>-treated MTs.** The  
265 reversible dissociation of the V<sub>1</sub> complex from the V<sub>o</sub> membrane-integrated complex is a  
266 well-known mechanism for regulating VA transport activity (22, 31, 34, 35, 37). To  
267 determine whether *Aedae*CAPA-1 influences VA complex dissociation, membrane and  
268 cytosolic protein fractions were isolated from DH<sub>31</sub> and DH<sub>31</sub> + *Aedae*CAPA-1 incubated  
269 MTs, and a polyclonal V<sub>1</sub> antibody (13) was used to measure protein abundance. First,  
270 membrane and cytosolic protein isolation was verified with specific cytosolic (beta-actin)  
271 and membrane (AQP1) markers (Fig. S4). Western blot analysis revealed three protein  
272 bands, with calculated molecular masses of 74 kDa, 56 kDa, and 32 kDa (13, 38) (Fig.  
273 S5). The V<sub>1</sub> complex is composed of eight subunits (A-H), which includes the A  
274 (~74kDa) and B subunit (~56Da) that are arranged in a ring forming the globular  
275 headpiece for ATP binding and hydrolysis (31). Additionally, studies have suggested that  
276 subunit D (~32kDa) alongside subunit F constitute the central rotational stalk of the V<sub>1</sub>  
277 complex (17). There was no difference in abundance observed for the A subunit (74 kDa  
278 band) in either membrane or cytosolic fractions between saline and DH<sub>31</sub> treatments  
279 whereas DH<sub>31</sub> + *Aedae*CAPA-1 incubated MTs had increased A subunit (74 kDa band)  
280 protein abundance in cytosolic fractions compared to saline treatment (Fig. 3A) and

281 decreased abundance in the membrane fraction compared to MTs treated solely with  
282  $DH_{31}$  (Fig. 3B). Similarly, the  $V_1$  complex B subunit abundance (56 kDa band) was  
283 similar in all treatments within the cytosolic protein fraction (Fig. 3C) whereas  $DH_{31}$  +  
284 *Aedae*CAPA-1 incubated MTs had significantly lower abundance in membrane fractions  
285 compared to MTs treated with  $DH_{31}$  alone (Fig. 3D). Finally, there was no difference in  
286 abundance of the  $V_1$  complex subunit D (32 kDa band) between saline and  $DH_{31}$  treated  
287 MTs in neither cytosolic or membrane fractions. However, as observed for the A and B  
288 subunit bands (74 and 56 kDa band, respectively)  $DH_{31}$  + *Aedae*CAPA-1 incubated MTs  
289 showed a significant increase in the D subunit in cytosolic fractions compared to saline  
290 treated MTs (Fig. 3E) and a decrease in its abundance in membrane fraction compared to  
291 MTs treated with  $DH_{31}$  alone (Fig. 3F). In summary, all three of the  $V_1$  complex  
292 immunoreactive bands corresponding to subunits A, B and D (74, 56 and 32 kDa,  
293 respectively) showed significantly higher abundance in cytosolic protein fractions and  
294 lower abundance in membrane fractions in  $DH_{31}$  + *Aedae*CAPA-1 incubated MTs.

295         To visualize this potential endocrine-mediated reorganization of the VA  
296 holoenzyme in this simple epithelium, we immunolocalized the membrane-integrated  $V_o$   
297 and cytosolic  $V_1$  complex in the female *A. aegypti* MTs. Transverse sections of saline-  
298 incubated (control) MTs demonstrated moderate enrichment of  $V_o$  (Fig. 4A, red), and  $V_1$   
299 (Fig 4B, green) complexes in the apical membrane of principal cells (Fig. 4C, S6A-D).  
300 Comparatively,  $DH_{31}$ -incubated MTs revealed intense localization of the  $V_o$  (Fig. 4D,  
301 red), and  $V_1$  (Fig 4E, green) complexes within principal cells, where  $V_1$  staining was  
302 strictly co-localized with  $V_o$  staining on the apical membrane (Fig. 4F, Fig. S6E-H).  
303 Interestingly, although  $V_o$  immunolocalization was restricted to the apical membrane,  $V_1$

304 immunoreactivity was observed in both the apical membrane and cytosolic region in  
305 DH<sub>31</sub> + *Aedae*CAPA-1 co-treated MTs (Fig. 4G-I, Fig. S6I-T). Immunostaining was  
306 absent in control preparations probed with only secondary antibodies (not shown)  
307 confirming the specific detection of the VA complexes with each primary antibody.

308 To investigate this endocrine-mediated phenomenon *in vivo*, we immunolocalized  
309 the membrane-integrated V<sub>o</sub> and cytosolic V<sub>1</sub> complex in blood-fed females at different  
310 time points. Whole body sections of non-blood-fed similarly aged females (control)  
311 demonstrated moderate enrichment of both V<sub>o</sub> (Fig. 5A, red), and V<sub>1</sub> (Fig. 4B, green) in  
312 the MTs, with minimal co-localization (Fig. 5C), resembling saline-incubated MTs.  
313 Interestingly, blood-fed female MTs revealed strong co-localization of the V<sub>o</sub> and V<sub>1</sub>  
314 complexes at 10 min (Fig. 5D-F) and 30 min (Fig. 5G-I) post blood-meal, whereas V<sub>1</sub>  
315 immunoreactivity was more dispersed in both the apical membrane and cytosolic area in  
316 MTs 3 hrs post blood-meal (Fig. 5J-L), comparable to non-blood-fed females.

317

## 318 **Discussion**

319 The MTs of the *Aedes* mosquito are the main organs responsible for the secretion  
320 of water and solutes, thereby contributing towards hydromineral homeostasis of the  
321 animal (39). Active ion transport in *A. aegypti* MTs is accomplished mainly by the V-  
322 ATPases (VA) densely localized in the apical brush-border membrane of principal cells,  
323 that energize the apical and basolateral membrane as well as the paracellular pathway,  
324 allowing for transepithelial secretion of NaCl, KCl, and other solutes (40). In animal  
325 cells, V-ATPase molecules in the plasma membrane, especially on the apical membrane  
326 of epithelial cells, contribute to extracellular acidification or alkalization, intracellular pH

327 homeostasis, or energize the plasma membrane for secondary active transport (41, 42). In  
328 insect MTs, the VA plays a major role in fluid secretion, thus serving as a primary target  
329 for both diuretic and, as this study demonstrates, anti-diuretic hormonal regulation of the  
330 insect ‘renal’ tubules. Although the structure and function of the VA has been elucidated  
331 in some detail (13, 20, 22, 31, 43–45), the regulation of the proton pump remains unclear.  
332 Of the various regulatory mechanisms for VA activity, the most studied is the reversible  
333 dissociation of the cytosolic  $V_1$  complex from the membrane-integrated  $V_o$  complex, first  
334 established in the midgut of the tobacco hornworm, *Manduca sexta* and yeast,  
335 *Saccharomyces cerevisiae* (44, 46). In this study, the activity and regulation of the VA  
336 was investigated under both diuretic and anti-diuretic hormone control of the adult female  
337 *A. aegypti* MTs. Notably, the current results advance our knowledge of the anti-diuretic  
338 control of the *A. aegypti* MTs, revealing a cellular mechanism for CAPA inhibition of the  
339 MTs by targeting the VA to block fluid secretion stimulated by select diuretic factors.  
340 This includes inhibition of the  $DH_{31}$ -related mosquito natriuretic peptide, which is critical  
341 for the post-haematophagy diuresis that eliminates excess water and sodium originating  
342 from the bloodmeal-derived plasma.

343 In insects, water excretion is tightly regulated to maintain homeostasis of ions and  
344 water (1, 47, 48). Female *A. aegypti* engorge a salt- and water-rich bloodmeal to obtain  
345 the necessary nutrients and proteins for their eggs (1), with about 40% of the ingested  
346 water eliminated in the first hour post feeding (49). The high rates of water excretion  
347 along with the high rates of primary urine production post bloodmeal suggest a highly  
348 coordinated and defined hormonal regulation of the signaling processes and downstream  
349 cellular targets for ion and water transport (50). In *Aedes* MTs, fluid secretion increases at

350 least three-fold after stimulation with mosquito natriuretic peptide (identified as DH<sub>31</sub>),  
351 via cAMP as a second messenger (1), activating PKA, which subsequently activates V-  
352 ATPase-driven cation transport processes (22, 35, 38). Herein we show that DH<sub>31</sub>-  
353 stimulated secretion is inhibited by bafilomycin, thought to block the proton channel of  
354 the VA (32). Moreover, the addition of either bafilomycin or *Aedae*CAPA-1 caused  
355 alkalization of the secreted fluid, indicating inhibition of the VA, which may lead to  
356 constrained entry of cations across the apical membrane through a proposed alkali  
357 cation/proton antiporter (15, 16). Thus, since bafilomycin inhibits DH<sub>31</sub>-stimulated  
358 secretion, this supports the VA as a target in the inhibition of fluid secretion.  
359 Consequently, the driving force for ion movement and osmotically-obliged water is  
360 reduced, but select Na<sup>+</sup> channels and cotransporters remain unaffected in the presence of  
361 *Aedae*CAPA-1, as observed by the unchanged natriuretic effect of DH<sub>31</sub> despite reduced  
362 secretion rates in response to *Aedae*CAPA-1 (4). Similar results were seen in 5HT-  
363 stimulated secretion, albeit a partial inhibition. An earlier study demonstrated that Ca<sup>2+</sup>-  
364 mediated diuresis does not require the assembly and activation of the VA (37, 38). The  
365 cAMP effect on the VA is implemented by protein kinase A (PKA), with inhibitors of  
366 PKA abolishing hormone-induced assembly and activation of the VA (34). Although the  
367 endogenous 5HT receptor expressed within the *A. aegypti* MTs necessary for diuretic  
368 activity remains elusive, in the kissing bug, *Rhodnius prolixus*, both cAMP and Ca<sup>2+</sup> have  
369 been shown to initiate diuresis in response to 5HT (51), which could explain the partial  
370 inhibitory response of *Aedae*CAPA-1 inhibition on 5HT-stimulated tubules as Ca<sup>2+</sup>-  
371 mediated diuresis is independent of the VA (38). Notably, the anticipated 5HT type 2  
372 receptor subtype expressed in the principal cells of the MTs is predicted to couple



373 through a Gq/11 signaling mechanism (52) and likely excludes the type 7 Gs-coupled  
374 receptor localized to tracheolar cells associated with the MTs (53, 54) as well as the type  
375 1 Gi-coupled receptor localized to principal cells in larval stage mosquitoes (55).

376 Interestingly, DH<sub>44</sub>-mediated stimulation was observed to be independent of the  
377 VA, as bafilomycin had no effect on the secretion rate or pH of the secreted fluid  
378 following application of this CRF-related diuretic peptide. Previous studies have noted  
379 that low nanomolar concentrations of a DH<sub>44</sub>-related peptide were linked to the  
380 stimulation of the paracellular pathway only (27), mediating this action through  
381 intracellular Ca<sup>2+</sup> as a second messenger (56). In contrast, high nanomolar concentrations  
382 of a DH<sub>44</sub>-related peptide were shown to influence both paracellular and transcellular  
383 transport, increasing intracellular Ca<sup>2+</sup> and cAMP (56). Although haemolymph  
384 concentrations of diuretic peptides have yet to be determined in mosquitoes, DH<sub>31</sub> is  
385 immediately released into circulation post bloodmeal, stimulating rapid secretion of Na<sup>+</sup>  
386 and excess water (23, 49). In contrast, DH<sub>44</sub>-stimulated diuresis in *A. aegypti* involves  
387 non-selective transport Na<sup>+</sup> and K<sup>+</sup> cations (4), this supports a delayed release of this  
388 diuretic hormone post-feeding to maintain production (albeit reduced) of primary urine  
389 whilst conserving Na<sup>+</sup> ions.

390 In unstimulated adult female *Aedes* MTs isolated *in vitro*, the VA exhibits  
391 variable rates of enzyme activity, consistent with highly variable rates of secretion, as  
392 found also in various other insect species (26, 57, 58). The VA is the main energizer in  
393 MTs as 60% of total ATPase activity can be linked to the VA (13), whereas the NKA,  
394 with around 28% of ATPase activity, also plays a role in membrane energization,  
395 denoting a more important role in the function of MTs than was previously assumed (19,

396 38–40). Here we show a significant two-fold increase in VA activity in MTs treated with  
397  $DH_{31}$  compared to the unstimulated MTs, with no change in VA activity in 5HT and  
398  $DH_{44}$ -treated MTs. Notably, *Aedae*CAPA-1 treatment blocked the  $DH_{31}$ -driven increase  
399 in VA activity, which corroborates the reduced fluid secretion rate and alkalization of the  
400 secreted fluid. Additionally, we sought to establish the importance of the  
401 NOS/cGMP/PKG pathway in the inhibitory actions of *Aedae*CAPA-1 on VA association.  
402 In stimulated MTs treated with *Aedae*CAPA-1 along with NOS inhibitor, L-NAME, or  
403 PKG inhibitor, KT5823, the inhibitory activity of *Aedae*CAPA-1 and its second  
404 messenger cGMP was abolished, resulting in elevated VA activity as a result of  $DH_{31}$   
405 treatment. The present study examined the effects of *Aedae*CAPA-1 on  $DH_{31}$ -stimulated  
406 VA activation for the first time in insects. Stimulation of  $DH_{31}$  causes an increase in  
407 cAMP production, which activates  $Na^+$  channels and the  $Na^+/K^+/2Cl^-$  cotransporter in the  
408 basolateral membrane (59) and up-regulates VA activity (as shown herein and  
409 previously) critical for increased fluid secretion (24). The  $DH_{31}$  receptor  
410 (*Aaeg*GPRCAL1) is expressed in a distal-proximal gradient in the MTs, with greater  
411 expression in principal cells where the VA in the apical membrane is highly expressed  
412 (19, 60). The co-localization of the  $DH_{31}$  receptor, VA, and cation exchangers (61–63) in  
413 the distal segment of the MTs, along with the CAPA receptor (6), collectively supports  
414 the major roles  $DH_{31}$  and CAPA play in post-prandial diuresis and anti-diuresis,  
415 respectively. In contrast to the marked changes in VA activity in response to diuretic and  
416 anti-diuretic hormones, NKA activity remained unchanged in response to treatments  
417 conducted herein. Further studies should examine the potential role of the NKA in  
418 diuretic and anti-diuretic processes.

419           The reversible dissociation of the  $V_1$  and  $V_o$  complexes is currently thought as a  
420 universal regulatory mechanism of V-ATPases, appearing to be widely conserved from  
421 yeast to animal cells (13, 22, 35, 64). Although previously shown with cAMP (24), it  
422 remained unclear whether other second messengers (eg.  $Ca^{2+}$ , cGMP, and nitric oxide)  
423 affect the assembly/disassembly of the  $V_1V_o$  complexes in insect MTs. In this study, VA  
424 protein abundance in membrane and cytosolic fractions of MTs was confirmed by  
425 western blot analyses. The 56 kDa band represents the B subunit (29), while the 74 kDa  
426 and 32 kDa bands are suggested to be the A and D subunits, respectively, of the  $V_1$   
427 complex (36). The higher abundance of these  $V_1$  complex protein subunits in the  
428 cytosolic fraction and lower abundance in membrane fraction in *Aedae*CAPA-1-treated  
429 MTs provides novel evidence of hormonally-regulated  $V_1$  dissociation from the  
430 holoenzyme in *A. aegypti* MTs. This was further confirmed with  $V_1$  staining found both  
431 in the apical membrane and cytosol of the MTs treated with  $DH_{31}$  and *Aedae*CAPA-1 in  
432 contrast to the strict co-localization of the  $V_1$  and  $V_o$  complex in the apical membrane of  
433 MTs treated with  $DH_{31}$  alone. In unstimulated *A. aegypti* MTs, 40-73% of the  $V_1$  subunits  
434 were found to be membrane associated, with reassembly of the  $V_1V_o$  complex observed  
435 upon stimulation with cAMP analogues (38). Although studies have revealed that  
436 hormonal regulation can activate the assembly of the holoenzyme, the signaling  
437 mechanisms achieving this control are unclear. In this study, the data provides evidence  
438 of VA assembly in  $DH_{31}$ -treated MTs, with  $V_1$  complex protein subunit enrichment found  
439 in the membrane fractions, confirming the crucial role of the VA in  $DH_{31}$ -stimulated  
440 secretion. Studies in *A. aegypti* have demonstrated the involvement of PKA in the  
441 activation and assembly of the VA upon natriuretic hormone (i.e.  $DH_{31}$ ) stimulation and

442 indicate the phosphorylation of the VA subunits by PKA in the MTs (38). These studies  
443 indicate a regulatory role of PKA in VA assembly and its activation that may be  
444 independent or in addition to phosphorylation (38). In line with these earlier observations,  
445 the current results indicate PKA is critical for DH<sub>31</sub>-stimulated fluid secretion by MTs  
446 whereas DH<sub>44</sub>-stimulated diuresis was found to be PKA-independent.

447       Together, these results indicate that *Aedae*CAPA-1 binding to its cognate receptor  
448 in principal cells of the MTs (6), targets the NOS/cGMP/PKG pathway (4, 6) to inhibit  
449 DH<sub>31</sub>-mediated elevation of cAMP (23, 59), which blocks PKA-activated VA association  
450 and prevents protons from being pumped across the apical membrane, resulting in a more  
451 alkaline lumen. Our study provides novel evidence that the anti-diuretic activity of CAPA  
452 is mediated through the dissociation of the VA holoenzyme involving the removal of the  
453 V<sub>1</sub> complex from the apical membrane, hindering luminal flux of protons that in turn  
454 starves cation/H<sup>+</sup> exchange, which ultimately reduces fluid secretion (Fig. 6). In *R.*  
455 *prolixus* MTs, the physiological roles of cGMP and cAMP were examined (65)  
456 suggesting cGMP inhibits fluid secretion by activating a phosphodiesterase (PDE) that  
457 degrades cAMP elevated following 5HT and diuretic hormone stimulation of MTs.  
458 Indeed, the current results demonstrated the addition of cAMP reversed the inhibitory  
459 effects of cGMP, while the addition of cGMP reduced the stimulatory response of cAMP,  
460 supporting that these two cyclic nucleotides facilitate two opposing physiological roles in  
461 the MTs of adult *A. aegypti*. The data herein reveals cGMP levels increase in MTs treated  
462 with CAPA alone or in combination with DH<sub>31</sub> while cAMP levels decrease in MTs  
463 treated with CAPA in combination with DH<sub>31</sub> compared to tubules stimulated with DH<sub>31</sub>  
464 alone, which upholds the roles of cAMP and cGMP in diuretic and anti-diuretic signaling

465 pathways, respectively. Interestingly, mid-nanomolar concentrations of DH<sub>44</sub> also led to  
466 increased levels of cAMP, with levels unchanging in response to *Aedae*CAPA-1, raising  
467 doubt regarding the involvement of a PDE. Treatment of a PKA inhibitor, KT5720,  
468 abolished DH<sub>31</sub>-stimulated secretion but had no effect on DH<sub>44</sub>-mediated stimulation. It is  
469 well established that the effects of cAMP are mediated by activation of cAMP-dependent  
470 protein kinase (PKA), a major cAMP target, followed by phosphorylation of target  
471 proteins (66). More recently, in *D. melanogaster* MTs, two distinct cAMP pathways have  
472 been elucidated to sustain fluid secretion; a PKA-dependent pathway, shown to regulate  
473 basal fluid secretion in principal cells; and a PKA-independent pathway, specifically a  
474 stimulatory principal EPAC (exchange proteins directly activated by cAMP) pathway,  
475 stimulating fluid secretion above basal levels (67). Future studies should examine the  
476 potential DH<sub>44</sub>-stimulated PKA-independent pathway leading to secretion in *A. aegypti*  
477 MTs.

478         In summary, our study highlights a novel target in the anti-diuretic signaling  
479 pathway of adult female *A. aegypti* MTs, emphasizing the intricate and precise regulatory  
480 mechanism of anti-diuresis. Although a plethora studies have investigated the process of  
481 hydromineral balance in terrestrial insects from a diuretic perspective (1, 10, 23, 68–70),  
482 these current findings advance our understanding of anti-diuretic hormone control while  
483 providing further evidence of a previously elusive endocrine regulatory mechanism of the  
484 VA in mosquitoes (Fig. 6). Given that many terrestrial insects are recognized as  
485 agricultural pests or disease vectors, further investigating the complex regulation of their  
486 ionic and osmotic balance may aid in lessening their burden on human health and

487 prosperity through development of improved management strategies that, at least in part,  
488 impede their neuroendocrine control of hydromineral homeostasis.

489

## 490 **Materials and Methods**

### 491 **Animal rearing**

492 Eggs of *Aedes aegypti* (Liverpool strain) were collected from an established  
493 laboratory colony described previously (4, 71). All mosquitoes were raised under a 12:12  
494 light:dark cycle. Non-blood fed female insects (three-six days post-eclosion) were used  
495 for bioassays, dissected under physiological saline (*Aedes* saline) adapted from (59) that  
496 contained (in mmol<sup>-1</sup>): 150 NaCl, 25 HEPES, 3.4 KCl, 7.5 NaOH, 1.8 NaHCO<sub>3</sub>, 1  
497 MgSO<sub>4</sub>, 1.7 CaCl<sub>2</sub>, and 5 glucose, and titrated to pH 7.1.

498

### 499 **MT fluid secretion assay**

500 In order to determine fluid secretion rates, modified Ramsay assays were  
501 performed as described previously (4, 72). Female adults (3-6 day old) were dissected  
502 under physiological *Aedes* saline prepared as described above, and MTs were removed  
503 and placed in a Sylgard-lined Petri dish containing 20 µL bathing droplets (1:1 mixture of  
504 Schneider's Insect Medium (Sigma-Aldrich): *Aedes* saline, immersed in hydrated mineral  
505 oil to prevent evaporation. The proximal end of each tubule was wrapped around a  
506 Minutien pin to allow for fluid secretion measurements. To investigate the effects of  
507 second messengers, cAMP and cGMP, on fluid secretion rate, 10<sup>-4</sup> M 8 bromo-cAMP  
508 (cAMP) (23, 65) and 10<sup>-8</sup> M 8 bromo-cGMP (cGMP) (4) (Sigma-Aldrich, Oakville, ON,  
509 Canada) were used against unstimulated MTs. To test the effects of the pharmacological

510 blocker KT5720 (7) (protein kinase A (PKA) inhibitor), a dosage of  $5 \mu\text{mol l}^{-1}$   
511 (manufacturer's recommended dose) was used against  $25 \text{ nmol l}^{-1}$   $\text{DH}_{31}$ - and  $10 \text{ nmol l}^{-1}$   
512  $\text{DH}_{44}$ -stimulated MTs.

513

#### 514 **Time course inhibition of bafilomycin**

515 Dosage of bafilomycin  $\text{A}_1$  was based on a dose-response analysis of bafilomycin  
516 against  $\text{DH}_{31}$ -stimulated tubules (Fig. S1). In the interest of determining whether  
517 bafilomycin inhibits the effects of the diuretic factors, dosages of  $25 \text{ nmol l}^{-1}$  *Drome* $\text{DH}_{31}$   
518 ( $\sim 84\%$  identical to *Aedae* $\text{DH}_{31}$ ) (4, 23, 73),  $100 \text{ nmol l}^{-1}$  5HT (4, 69, 74), and  $10 \text{ nmol l}^{-1}$   
519 *Rhopr*DH (CRF-related diuretic peptide,  $\text{DH}_{44}$ ) ( $\sim 48\%$  overall identity;  $\sim 65\%$  identity  
520 and  $\sim 92\%$  similarity within the highly-conserved N-terminal region to *Aedae* $\text{DH}_{44}$ ) (4,  
521 56, 75, 76), were applied to the isolated MTs. Neurohormone receptors, including those  
522 for 5HT, and the peptides  $\text{DH}_{31}$ ,  $\text{DH}_{44}$ , and CAPA, are localized to the basolateral  
523 membrane of principal cells (6, 61, 82), while the LK receptor is localized exclusively to  
524 stellate cells (5). As a result, the effects of bafilomycin were tested on diuretics known to  
525 act on the principal cells of the MTs. After incubating with the individual diuretics for 30  
526 min (using the modified Ramsay assay), diuretic peptide was added alone (controls) or in  
527 combination with bafilomycin (final concentration  $10^{-5}$  M). The fluid secretion rate was  
528 recorded every 10 min for a total of 80 min. In order to determine whether inhibition of  
529 the VA was involved in the anti-diuretic activity of CAPA peptides on adult MTs, the  
530 effects of  $1 \text{ fmol l}^{-1}$  *Aedae*CAPA-1 (4, 6) were investigated in combination with  $\text{DH}_{31}$   
531 and bafilomycin.

532

### 533 **Measurement of pH of secreted fluid**

534           The pH of secreted fluid was measured by using ion-selective microelectrodes  
535 (ISME) pulled from glass capillaries (TW-150-4, World Precision Instruments, Sarasota,  
536 FL, USA) using a Sutter P-97 Flaming Brown pipette puller (Sutter Instruments, San  
537 Raffael, CA, USA). Microelectrodes were silanized with *N,N*-  
538 dimethyltrimethylsilylamine (Fluka, Buchs, Switzerland) pipetted onto the interior of a  
539 glass dish inverted over the group of microelectrodes. A 1:2 ratio of number of  
540 microelectrodes to amount of silanization solution (in  $\mu\text{l}$ ) was used. The microelectrodes  
541 were left to silanize for 75 min at  $350^{\circ}\text{C}$  and left to cool before use. The microelectrodes  
542 were back-filled with a solution containing  $100\text{ mmol l}^{-1}$  NaCl and  $100\text{ mmol l}^{-1}$  sodium  
543 citrate that was titrated to pH 6.0 and front-filled using Hydrogen Ionophore I – cocktail  
544 B (Fluka, Buchs, Switzerland). The electrode tips were then coated with ~3.5% (w/v)  
545 polyvinyl chloride (PVC) dissolved in tetrahydrofuran, to avoid displacement of the  
546 ionophore cocktail when submerged in the paraffin oil (77). The  $\text{H}^{+}$ -selective  
547 microelectrodes were calibrated in *Aedes* saline titrated to either pH 7.0 or pH 8.0.  
548 Reference electrodes were prepared from glass capillaries (1B100F-4, World Precision  
549 Instruments) using a pipette puller described above and were backfilled with  $500\text{ mmol l}^{-1}$   
550  $\text{KCl}$ . Secreted droplet pH measurements were done immediately after collection to  
551 prevent alkalization of the droplet due to carbon dioxide diffusion into the paraffin oil.  
552 Microelectrodes and reference electrodes were connected to an electrometer through  
553 silver chloride wires where voltage signals were recorded through a data acquisition  
554 system (Picolog for Windows, version 5.25.3). In order to measure pH of the secreted



555 fluid, tubules were set up using the Ramsay assay, and pH measurements were recorded  
556 every 10 min for a total of 60 min.

557

### 558 **NKA and VA activities**

559 The Na<sup>+</sup>/K<sup>+</sup>-ATPase (NKA) and VA activity in the MTs was determined using a  
560 modified 96-well microplate method (78, 79), which relies on the enzymatic coupling of  
561 ouabain- or bafilomycin-sensitive hydrolysis of ATP to the oxidation of reduced  
562 nicotinamide adenine dinucleotide (NADH). The microplate spectrophotometer is  
563 therefore able to directly measure the disappearance of NADH. Adult female MTs (three  
564 to six day old) were dissected and incubated for 30 min in *Aedes* saline, diuretic (DH<sub>31</sub>,  
565 5HT, or DH<sub>44</sub>) alone or combined with *Aedae*CAPA-1. Following 30-min incubation,  
566 MTs were collected into 1.5 mL microcentrifuge tubes (40-50 sets of MTs per tube =  
567 200-250 MTs per treatment), flash frozen in liquid nitrogen and stored at -80°C. To  
568 investigate the effects of the pharmacological blockers, a nitric oxide synthase (NOS)  
569 inhibitor, N<sub>ω</sub>-Nitro-L-arginine methyl ester hydrochloride (L-NAME), and protein kinase  
570 G (PKG) inhibitor, KT5823, were used against DH<sub>31</sub>-stimulated MTs treated with  
571 *Aedae*CAPA-1 or 10<sup>-8</sup> M cGMP. Dosages of 2 μmol l<sup>-1</sup> L-NAME (manufacturer's  
572 recommended dose) and 5 μmol l<sup>-1</sup> KT582336 were applied to the MTs (4, 6, 7).

573 Tissues were thawed on ice and 150 μL of homogenizing buffer (four parts of SEI  
574 with composition (in mmol l<sup>-1</sup>): 150 sucrose, 10 EDTA, and 50 imidazole; pH 7.3 and  
575 one part of SEID with composition: 0.5% of sodium deoxycholic acid in SEI) and MTs  
576 were then sonicated on ice for 10 sec (two pulses of 5 sec) and subsequently centrifuged

577 at 10,000 x g for 10 min at 4°C. The supernatant was transferred into a fresh  
578 microcentrifuge tube and stored on ice.

579 Prior to the assay, three solutions were prepared (Solution A, B, and C) and all  
580 stored on ice. Solution A contained 4 units mL<sup>-1</sup> lactate dehydrogenase (LDH), 5 units  
581 mL<sup>-1</sup> pyruvate kinase (PK), 50 mmol l<sup>-1</sup> imidazole, 2.8 mmol l<sup>-1</sup> phosphoenolpyruvate  
582 (PEP), 0.22 mmol l<sup>-1</sup> ATP, and 50 mmol l<sup>-1</sup> NADH, pH 7.5. The solution was  
583 subsequently mixed with a salt solution in a 4:1 ratio (salt solution composition (in mmol  
584 l<sup>-1</sup>): 189 NaCl, 10.5 MgCl<sub>2</sub>, 42 KCl, and 50 imidazole, pH 7.5. Working solution B  
585 consisted of solution A with 5 mmol l<sup>-1</sup> ouabain and solution C consisted of solution A  
586 with 10 μmol l<sup>-1</sup> bafilomycin. The concentrations of ouabain and bafilomycin were based  
587 on previous studies (78). To ensure the batch of assay mixture (Solution A) was effective,  
588 an adenosine diphosphate (ADP) standard curve was run. ADP standards were prepared  
589 as follows: 0 nmol 10μL<sup>-1</sup> (200μL of 50mmol l<sup>-1</sup> imidazole buffer (IB), pH 7.5); 5 nmol  
590 10μL<sup>-1</sup> (25μL of 4mmol l<sup>-1</sup> ADP stock and 175μL of IB); 10 nmol 10uL<sup>-1</sup> (50μL of  
591 4mmol l<sup>-1</sup> ADP stock/ 150 μL of IB); 20 nmol 10 μL<sup>-1</sup> (100μL of 4mmol l<sup>-1</sup> ADP  
592 stock/100μL of IB); 40 nmol 10 μL<sup>-1</sup> (40 mmol l<sup>-1</sup> ADP stock). The standards were added  
593 to a 96-well polystyrene microplate in duplicates of 10 μL per well, followed by the  
594 addition of 200 μL of solution A. The plate was placed in a Thermo Multiscan Spectrum  
595 microplate spectrophotometer set at 25°C and a linear rate of NADH disappearance was  
596 measured at 340 nm. The absorbance spectra were recorded and analyzed using the  
597 Multiscan Spectrum data acquisition system with SkanIt version 2.2 software. The ADP  
598 standards (0 to 40 nmoles well<sup>-1</sup>) should yield an optical density (OD) between 0.9 and  
599 0.2 OD units, while the slope of the curve should result in -0.012 to -0.014 OD nmol

600 ADP<sup>-1</sup>. Homogenized MT samples were thawed and added to the microplate (kept on ice)  
601 in six replicates of 10 µL per well. Next, two wells per sample were filled with 200 µL of  
602 working solution A, two wells with 200 µL of working solution B and two wells with 200  
603 µL of working solution C (Fig. 4B). The microplate was quickly placed in the microplate  
604 spectrophotometer and the decrease in NADH absorbance was measured for 30 min at  
605 340 nm. NKA and VA activity was calculated using the following equation:

$$606 \quad \text{NKA or VA activity} = (((\Delta\text{ATPase}/S)/[\text{P}]) \times 60 \text{ (min)}),$$

607 where  $\Delta\text{ATPase}$  is the difference in ATP hydrolysis in the absence and presence of  
608 ouabain or bafilomycin,  $S$  is the slope of the ADP standard curve,  $[\text{P}]$  is the protein  
609 concentration of the sample. Protein was quantified using a Bradford assay (Sigma-  
610 Aldrich Canada, Ltd.,) according to manufacturer's guidelines with bovine serum  
611 albumin (Bioshop Canada Inc., Burlington, ON, Canada) as a standard. Final activity was  
612 expressed as micromoles of ADP per milligram of protein per hour.

613

#### 614 **Protein processing and western blot analyses**

615 MTs were isolated under physiological saline from 40-50 female *A. aegypti* for  
616 each biological replicate (defined as  $n = 1$ ) and incubated for 60 min in the following  
617 three treatments: *Aedes* saline, 25 nmol l<sup>-1</sup> DH<sub>31</sub>, or 25 nmol l<sup>-1</sup> DH<sub>31</sub> + 1 fmol l<sup>-1</sup>  
618 *Aedae*CAPA-1. Following the incubation, tissues were stored at -80°C until processing.  
619 To separate the membrane and cytosolic proteins, a membrane protein extraction kit was  
620 used (ThermoFisher Scientific) following recommended guidelines for soft tissue with  
621 minor modifications including 200 µL of permeabilization and solubilization buffer and a  
622 1:200 protease inhibitor cocktail (Sigma Aldrich) in both buffers. Final protein

623 concentrations were calculated by Bradford assay (Sigma-Aldrich Canada, Ltd.)  
624 according to manufacturer's guidelines with bovine serum albumin (BioRad  
625 Laboratories) as a standard and quantified using an A<sub>o</sub> Absorbance Microplate Reader  
626 (Azure Biosystems) at 595 nm.

627 Protein samples were denatured by heating for 5 min at 100°C with 6X loading  
628 buffer (225 mmol l<sup>-1</sup> Tris-HCl pH 6.8, 3.5% (w/v) SDS, 35% glycerol, 12.5% (v/v) β-  
629 mercaptoethanol and 0.01% (w/v) Bromophenol blue). Into each lane, 5 μg of protein  
630 was loaded onto a 4% stacking and 12% resolving sodium dodecyl sulphate  
631 polyacrylamide gel electrophoresis (SDS-PAGE) gel. Protein samples were migrated  
632 initially at 80 V for 30 min and subsequently at 110 V for 90 min before being transferred  
633 onto a polyvinylidene difluoride (PVDF) membrane using a wet transfer method at 100 V  
634 for 60 min in a cold transfer buffer. Following transfer, PVDF membranes were blocked  
635 with 5% skim milk powder in Tris-buffered saline (TBS-T; 9.9 mmol l<sup>-1</sup> Tris, 0.15 mmol  
636 l<sup>-1</sup> NaCl, 0.1 mmol l<sup>-1</sup> Tween-20, 0.1 mmol l<sup>-1</sup> NP-40 pH 7.4) for 60 min at RT, and  
637 incubated on a rocking platform overnight at 4°C with a guinea pig polyclonal anti-VA  
638 (Ab 353-2 against the V<sub>1</sub> complex of the VA (13), a kind gift from Profs. Wieczorek and  
639 Tiburcy, University of Osnabruck, Germany, used at a 1:2000 dilution in 5% skim milk  
640 in TBS-T. The next day, PVDF membranes were washed for 60 min in TBST-T,  
641 changing the wash buffer every 15 min. Immunoblots were then incubated with a goat  
642 anti-guinea pig HRP conjugated secondary antibody (1:2500 in 5% skim milk in TBS-T)  
643 (Life Technologies, Burlington, ON) for 60 min at RT and subsequently washed three  
644 times for 15 min with TBS-T. Lastly, blots were incubated with the Clarity Western ECL  
645 substrate and images were acquired using a ChemiDoc MP Imaging System (Bio-Rad).

646 Molecular weight measurements were performed using Image Lab 5.0 software (Bio-  
647 Rad). PVDF membranes were then probed with Coomassie brilliant blue, since total  
648 protein normalization is now considered the benchmark method for quantitative analysis  
649 of western blot data (80, 81) and has been used in studies involving *A. aegypti* protein  
650 normalization (82). ImageJ software (NIH, USA) was used to quantify protein  
651 abundance. (Fig. 3 and S5 show a saturated blot of the 56kDa band to ensure  
652 visualization of the 74kDa and 32kDa band, however protein quantification was  
653 measured using a pre-saturated blot).

654 To confirm successful separation of membranes from cytosol using the membrane  
655 protein extraction kit, saline-incubated MTs were incubated in either anti-beta-tubulin  
656 (cytosolic marker, 1:5000) or -AaAQP1 affinity purified rabbit polyclonal antibody  
657 (generous gift from Dr. Andrew Donini, York University, Canada) (83) (membrane  
658 marker, 1:1000). Blots were then incubated with a goat anti-mouse (for beta-tubulin) or  
659 goat anti-rabbit (for AQP1) HRP-conjugated secondary antibody (1:5000 in 5% skim  
660 milk in TBS-T) (Life Technologies, Burlington, ON) for 60 min at RT (beta-tubulin).

661

### 662 **Immunolocalization of VA complexes in MTs**

663 Immunohistochemistry of the MTs localizing the VA complexes was conducted  
664 following a previously published protocol (84). Adult female MTs (three to six day old)  
665 were dissected out in *Aedes* saline and incubated following similar conditions described  
666 in the western blot section above. After the incubation, the MTs were immersed in  
667 Bouin's solution and fixed for two hours in small glass vials. To test *in vivo* changes of  
668 the VA complexes, five to six day old females were allowed to blood-feed for 20 min

669 (71), after which female mosquitoes were isolated at 10 min, 30 min, and 3 hr post blood-  
670 meal. Similarly aged, non blood-fed (sucrose-fed) females were isolated as controls.  
671 Following the bloodmeal, whole body females were immersed in Bouin's solution and  
672 fixed for three hours in small glass vials. Tissues/whole body females were then rinsed  
673 three times and stored in 70% ethanol at 4°C until further processing. Fixed samples were  
674 dehydrated through a series of ethanol washes: 70% ethanol for 30 min, 95% ethanol for  
675 30 min, and 100% ethanol three times for 30 min. The samples were cleared with xylene  
676 (ethanol:xylene for 30 min then 100% xylene three times for 30 min), and infiltrated in  
677 Paraplast Plus Tissue Embedding Medium (Oxford Worldwide, LLC, Memphis, USA) at  
678 xylene:paraffin wax for 60 min at 60°C, then rinsed in pure paraffin wax twice for 1 hour  
679 for 60°C. Following the last rinse, the samples were embedded in the paraffin wax and  
680 left to solidify at 4°C until further processing. Sections (5 µm) were cut using a Leica RM  
681 2125RT manual rotary microtome (Leica Microsystems Inc., Richmond Hill, Canada)  
682 and slides were incubated overnight on a slide warmer at 45°C.

683       The following day, sections were deparaffinized with xylene (two rinses for 5 min  
684 each), and rehydrated via a descending series of ethanol washes (100% ethanol twice for  
685 2 min, 95% ethanol for 2 min, 70% ethanol for 2 min, 50% ethanol for 2 min) and finally  
686 in distilled water for 20 min. Next, sections were subjected to a heat-induced epitope  
687 retrieval (HIER) by immersing slides in a sodium citrate buffer (10 nmol l<sup>-1</sup>, pH 6.0) and  
688 heating both slides and solution in a microwave oven for 4 min. The solution and slides  
689 were allowed to cool for 20 min, reheated for 2 min, and left to stand at room temperature  
690 (RT) for 15 min. Slides were then washed three times in phosphate-buffered saline (PBS)  
691 pH 7.4, 0.4% Kodak Photo-Flo 200 in PBS (PBS/PF, 10 min), 0.05% Triton X-100 in

692 PBS (PBS/TX, 10 min), and 10% antibody dilution buffer (ADB; 10% goat serum, 3%  
693 BSA and 0.05% Triton X-100 in PBS) in PBS (PBS/ADB, 10 min). Slides were  
694 incubated overnight at RT with a guinea pig polyclonal anti-V<sub>1</sub> (Ab 353-2 against the V<sub>1</sub>  
695 complex, identical antibody used in western blot analyses, at 1:5000 dilution in ADB) in  
696 combination with a 1:100 mouse polyclonal anti-ATP6V0A1 antibody for V<sub>0</sub> (Abnova,  
697 Taipei, Taiwan).

698       Following overnight primary antibody incubation, slides were washed briefly in  
699 distilled water, with sequential washes with PBS/PF, PBS/TX, and PBS/ADB for 10 min  
700 each as described above. A goat anti-guinea pig antibody (for V<sub>1</sub> detection) conjugated to  
701 AlexaFluor 488 (1:500 in ADB, Jackson ImmunoResearch) and sheep anti-mouse  
702 antibody (for V<sub>0</sub> detection) conjugated to AlexaFluor 594 (1:500 in ADB, Jackson  
703 ImmunoResearch) were applied to visualize the VA complexes. The slides were left to  
704 incubate in the secondary antibody for 60 min at RT. For negative controls, slides were  
705 processed as described above with primary antibodies omitted. Slides were then washed  
706 in distilled water/0.4% PF three times for 1 min each and finally in distilled water for 1  
707 min. Slides were air dried for 30 min and mounted using ProLong<sup>TM</sup> Gold antifade  
708 reagent with DAPI (Life Technologies, Burlington, ON, Canada). Fluorescence images  
709 were captured using an Olympus IX81 inverted fluorescent microscope (Olympus  
710 Canada, Richmond Hill, ON, Canada).

711

## 712 **cGMP and cAMP Measurements**

713       A competitive cGMP ELISA kit (Cell Signaling Technology, #4360) and cAMP  
714 ELISA kit (Cell Signaling Technology, #4339) were used to measure the effect of DH<sub>31</sub>,

715 DH<sub>44</sub> and *Aedae*CAPA-1 on cGMP and cAMP levels in the MTs. Adult MTs were  
716 isolated under physiological saline from 50 female *A. aegypti* for each biological  
717 replicate (defined as n = 1). To prevent cGMP degradation, tubules were incubated first  
718 with a phosphodiesterase inhibitor, 0.1 mmol l<sup>-1</sup> zaprinast, for 10 min (85) or 0.5 mmol l<sup>-1</sup>  
719 3-isobutyl-1-methylxanthine (IBMX) for 10 min (23) before any of the experimental  
720 treatments, specifically *Aedes* saline, 25 nmol<sup>-1</sup> DH<sub>31</sub>, 10 nmol l<sup>-1</sup> DH<sub>44</sub>, 1 fmol<sup>-1</sup>  
721 *Aedae*CAPA-1, 25 nmol<sup>-1</sup> DH<sub>31</sub> + 1 fmol<sup>-1</sup> *Aedae*CAPA-1, or 10 nmol<sup>-1</sup> DH<sub>44</sub> + 1 fmol<sup>-1</sup>  
722 *Aedae*CAPA-1 for a further 20 min. After incubation was complete, tissues were stored at  
723 -80°C until processing. To measure cGMP and cAMP concentrations, frozen tubule  
724 samples were thawed on ice and 125 µL of 1X cell lysis buffer (CLB, #9803) was added  
725 to each tube (1 mmol<sup>-1</sup> phenylmethylsulfonyl fluoride (PMSF) was added to 1X CLB  
726 fresh each time). Tissue samples were kept on ice for 10 min, sonicated for 10 s (similar  
727 conditions as described for NKA/VA activity assay), centrifuged for 3 min at 10,000 rpm,  
728 and the supernatant was isolated and kept on ice. Using a commercial 96-well microtitre  
729 plate precoated with either a cGMP or cAMP rabbit monoclonal antibody, the cGMP-  
730 HRP (or cAMP-HRP) conjugate was added in triplicate wells with 50 µL per well. This  
731 was followed by the addition of 50 µL of either tubule samples or cGMP (or cAMP)  
732 standards ranging from 100 nmol<sup>-1</sup> to 0.25 nmol<sup>-1</sup>. The plate was covered and incubated  
733 at RT for 3 h on a horizontal orbital plate shaker. Following incubation, plate contents  
734 were discarded, and wells were washed four times with 200 µL/well of 1X wash buffer.  
735 Next, 100 µL of 3,3',5,5'-tetramethylbenzidine (TMB) substrate was added to each well,  
736 and the plate was covered and kept for 10 min at RT. The enzymatic reaction was



737 quenched by adding 100  $\mu\text{L}$  of 2  $\text{mmol}^{-1}$  HCl and absorbance read at 450 nm using a  
738 Synergy 2 Microplate Reader (Biotek).

739

#### 740 **Statistical analyses**

741 Data was compiled using Microsoft Excel and transferred to Graphpad Prism  
742 software v.7 to create figures and conduct all statistical analyses. Data was analyzed  
743 accordingly using a one-way or two-way ANOVA and a Bonferroni post-test, or  
744 Student's t-test, with differences between treatments considered significant if  $p < 0.05$ .

745

#### 746 **Acknowledgments**

747 The authors sincerely thank Prof. Helmut Wiczorek and Prof. Felix Tiburecy (University  
748 of Osnabrück, Germany) for providing the  $V_1$  antibody and Prof. Andrew Donini (York  
749 University, Canada) for providing the *A. aegypti* AQP1 antibody that were used in this  
750 study. The authors are also grateful to Prof. Ian Orchard (University of Toronto  
751 Mississauga, Canada) and Prof. Michael J. O'Donnell (McMaster University, Canada) for  
752 providing synthetic peptides, *RhoprDH* and *DromeDH*<sub>31</sub> respectively, used in this study.

753

#### 754 **Funding**

755 This research was funded by: Natural Sciences and Engineering Research Council of  
756 Canada (NSERC) Discovery Grant (JPP), Ontario Ministry of Research Innovation Early  
757 Researcher Award (JPP), and NSERC CGS-D (FS) and the Carswell Scholarships in the  
758 Faculty of Science, York University (FS) along with a MITACS Globalink Research  
759 Internship (MFV).

760

## 761 **Data and materials availability**

762 All data are available in the main text or the supplementary materials. Additional data  
763 related to this paper may be requested from the authors.

764

## 765 **Figures and Tables**

766 **Fig. 1.** Effect of bafilomycin on fluid secretion rates and pH along with cyclic nucleotide  
767 second messengers on adult *A. aegypti* MTs. Tubules were treated with either (A) DH<sub>31</sub>  
768 (B) 5HT or (C) DH<sub>44</sub> and secreted droplets were measured at 10-min intervals for 30 min.  
769 Immediately following measurement of the 30-min point fluid droplet (solid arrow), MTs  
770 were treated with (A) DH<sub>31</sub> (B) 5HT (C) or DH<sub>44</sub> alone or in combination with  
771 *AedaeCAPA-1* or bafilomycin. (D) MTs were treated with DH<sub>31</sub> alone or in combination  
772 with *AedaeCAPA-1*, bafilomycin, or both *AedaeCAPA-1* and bafilomycin for 60 min.  
773 Secreted fluid pH was measured in tubules treated with either (E) DH<sub>31</sub> (F) 5HT or (G)  
774 DH<sub>44</sub> before and after addition of *AedaeCAPA-1*, bafilomycin, or both *AedaeCAPA-1*  
775 and bafilomycin along with unstimulated MTs (H). Production of (I) cGMP and (J)  
776 cAMP in DH<sub>31</sub>-stimulated MTs treated with *AedaeCAPA-1*. (A-C) Significant  
777 differences between bafilomycin-treated and the corresponding time point controls and  
778 (E-H) significant differences in secreted fluid pH between *AedaeCAPA-1*- and  
779 bafilomycin-treated and the corresponding time point controls are denoted by an asterisk,  
780 as determined by a two-way ANOVA and Bonferroni multiple comparison post-hoc test  
781 ( $p < 0.05$ ). Data represent the mean  $\pm$  standard error (n=12-34), ns denotes no statistical  
782 significance. (D, I, J) Bars labeled with different letters are significantly different from

783 each other (mean± SEM; one-way ANOVA with Bonferroni multiple comparison,  
784  $p < 0.05$ , (D)  $n = 7-17$ ) (I, J)  $n = 50$  sets of MTs for all treatments ( $n = 3$  per treatment)). (K)  
785 Fluid secretion rates were measured at 10 min intervals initially over a 30 min interval  
786 (unstimulated) and then over a second 30 min interval after the addition (solid arrow) of  
787  $10^{-4}$  M cAMP or  $10^{-8}$  M cGMP. Significant differences between cAMP-treated MTs and  
788 the corresponding time point controls (or cGMP- treated MTs) are denoted by an asterisk  
789 (mean± SEM; two-way ANOVA with Bonferroni multiple comparison,  $p < 0.05$ ,  $n = 5-6$ ).  
790 (L) Significant differences between cAMP-treated MTs and corresponding time point  
791 after addition at 30 min (downward arrow) of cGMP are denoted by an asterisk (similar  
792 with cGMP alone and cAMP added at 30 min, mean± SEM; one-way ANOVA with  
793 Bonferroni multiple comparison,  $p < 0.05$ ,  $n = 5-9$ ).

794

795 **Fig. 2.** Effect of *Aedae*CAPA-1 and NOS/PKG inhibitors on VA and NKA activity in  
796 diuretic stimulated *A. aegypti* MTs. MTs were incubated in *Aedes* saline, diuretics (DH<sub>31</sub>,  
797 5HT, and DH<sub>44</sub>) alone or in combination with *Aedae*CAPA-1 for 30 min before collection  
798 to measure (A) VA and (B) NKA activity. (C) MTs were treated with pharmacological  
799 blockers, NOS inhibitor (<sub>L</sub>-NAME) and PKG inhibitor (KT5923) in combination with  
800 either *Aedae*CAPA-1 or cGMP. Bars labeled with different letters are significantly  
801 different from each other (mean± SEM; one-way ANOVA with Bonferroni multiple  
802 comparison,  $p < 0.05$ ). N.S. denotes no statistical significance. For each treatment, 50 sets  
803 of MTs were collected with  $n = 3$  biological replicates per treatment.

804

805 **Fig. 3.** Membrane and cytosolic protein abundance of the V<sub>1</sub> complex in MTs of *A.*  
806 *aegypti*. The MTs (n=40-50) were incubated in *Aedes* saline, DH<sub>31</sub>, or DH<sub>31</sub> +  
807 *Aedae*CAPA-1 for one hour before collection. Protein abundance was measured in the  
808 (A) 74 kDa band, A subunit (B) 56 kDa band, B subunit and (c) 32 kDa band, D subunit  
809 of the V<sub>1</sub> complex. Individual band densities were normalized to total protein using  
810 Coomassie staining, and graphed relative to saline-treated controls. Bars labeled with  
811 different letters are significantly different from each other (mean± SEM; one-way  
812 ANOVA with Bonferroni multiple comparison, p<0.05, n=3-4 replicates).

813

814 **Fig. 4.** Immunolocalization of the V<sub>o</sub> and V<sub>1</sub> complexes in transverse sections of  
815 stimulated *A. aegypti* MTs. Representative paraffin-embedded sections of *A. aegypti* MTs  
816 incubated in either (A-C) *Aedes* saline alone, (D-F) DH<sub>31</sub> and (G-I) DH<sub>31</sub> + *Aedae*CAPA-  
817 1 for 30 min. Panels (A,D,G) show V<sub>o</sub> staining (red), (B,E,H) show V<sub>1</sub> staining (green),  
818 and panels (C,F,I) show merged images with staining highly colocalized in DH<sub>31</sub>  
819 treatment but less evident in saline and *Aedae*CAPA-1 added treatments. Solid white  
820 arrows denote apical VA staining, and empty arrows indicate cytosolic VA staining.  
821 Where visible in sections, DAPI nuclear staining is shown in blue. Scale bar 100 μm, n =  
822 4 biological replicates (SC = stellate cell).

823

824 **Fig. 5.** Immunolocalization of the V<sub>o</sub> and V<sub>1</sub> complexes in blood-fed *A. aegypti* females.  
825 Representative paraffin-embedded sections of whole-body non-blood-fed females (A-C),  
826 blood-fed females isolated (D-F) 10 min (G-I) 30 min and (J-L) 3 hr post blood-meal.  
827 Panels (A,D,G,J) show V<sub>o</sub> staining (red), (B,E,H,K) show V<sub>1</sub> staining (green), and panels

828 (C,F,I,L) show merged immunoreactive staining. DAPI nuclear staining is shown in blue.

829 Scale bar 100  $\mu\text{m}$ , n = 4 biological replicates.

830

831 **Fig. 6.** Schematic diagram summarizing the signaling pathway of diuretic and anti-  
832 diuretic control of adult *A. aegypti* MTs. The principal cells in *A. aegypti* MTs are  
833 responsible for the transport of  $\text{Na}^+$  and  $\text{K}^+$  cations via secondary active transport,  
834 energized by the V-type  $\text{H}^+$ -ATPase (VA), localized in the brush border of the apical  
835 membrane. The movement of protons creates a gradient, driving the exchange of  $\text{Na}^+$  and  
836  $\text{K}^+$  through cation/ $\text{H}^+$  antiporters (NHA). Neurohormone receptors for  $\text{DH}_{31}$ , 5HT,  $\text{DH}_{44}$ ,  
837 and CAPA are localized to the basolateral membrane of the principal cells, while the  
838 kinin receptor is localized exclusively in the stellate cells. The current results together  
839 with previous data indicates that  $\text{DH}_{31}$  stimulates diuresis through activation and  
840 assembly of the VA in the apical membrane, with no effect on the  $\text{Na}^+/\text{K}^+$ -ATPase  
841 (NKA). The anti-diuretic effect of *Aedae*CAPA-1, facilitated by the NOS/cGMP/PKG  
842 pathway, causes  $V_1$  dissociation from the membrane, hindering activity, and thus  
843 reducing fluid secretion. The biogenic amine, 5HT, has also been shown to stimulate  
844 activation of the VA, however, to a lesser extent.  $\text{DH}_{44}$ -related peptide receptor activation  
845 increases  $\text{Ca}^{2+}$  (as well as cAMP at higher doses) but its action was found to be  
846 independent of PKA and VA. Lastly, it was shown earlier that cGMP inhibits kinin-  
847 stimulated diuresis, suggesting an additional anti-diuretic factor may exist that acts  
848 specifically on stellate cells.

849

850 **References**

- 851 1. K. W. Beyenbach, Transport mechanisms of diuresis in Malpighian tubules of  
852 insects. *J. Exp. Biol.* **206**, 3845–3856 (2003).
- 853 2. T. M. Clark, T. J. Bradley, Malpighian tubules of larval *Aedes aegypti* are  
854 hormonally stimulated by 5-hydroxytryptamine in response to increased salinity.  
855 *Arch. Insect Biochem. Physiol.* **34**, 123–141 (1997).
- 856 3. G. M. Coast, C. S. Garside, Neuropeptide control of fluid balance in insects, *Ann.*  
857 *N.Y. Acad. Sci.* **1040**: 1–8 (2005).
- 858 4. F. Sajadi, C. Curcuruto, A. Al Dhaheri, J.-P. V Paluzzi, Anti-diuretic action of a  
859 CAPA neuropeptide against a subset of diuretic hormones in the disease vector,  
860 *Aedes aegypti*. *J. Exp. Biol.* (2018).
- 861 5. H. L. Lu, C. Kersch, P. V. Pietrantonio, The kinin receptor is expressed in the  
862 Malpighian tubule stellate cells in the mosquito *Aedes aegypti* (L.): A new model  
863 needed to explain ion transport? *Insect Biochem. Mol. Biol.* **41**, 135–140 (2011).
- 864 6. F. Sajadi, *et al.*, CAPA neuropeptides and their receptor form an anti-diuretic  
865 hormone signaling system in the human disease vector, *Aedes aegypti*. *Sci. Rep.* **10**  
866 (2020).
- 867 7. A. Ionescu, A. Donini, *Aedes* CAPA-PVK-1 displays diuretic and dose dependent  
868 antidiuretic potential in the larval mosquito *Aedes aegypti* (Liverpool). *J. Insect*  
869 *Physiol.* **58**, 1299–1306 (2012).
- 870 8. R. Jurenka, The PRXamide neuropeptide signalling system. Conserved in animals,

- 871 *Adv. Insect Phys.* (Academic Press, 2015), pp. 123–170.
- 872 9. S. A. Davies, *et al.*, Signaling by *Drosophila* capa neuropeptides. *Gen. Comp.*  
873 *Endocrinol.* **188**, 60–66 (2012).
- 874 10. S. Terhzaz, *et al.*, Mechanism and function of *drosophila* capa GPCR: A  
875 desiccation stress-responsive receptor with functional homology to human  
876 neuromedinu receptor. *PLoS One* **7** (2012).
- 877 11. H. A. MacMillan, *et al.*, Anti-diuretic activity of a CAPA neuropeptide can  
878 compromise *Drosophila* chill tolerance. *J. Exp. Biol.* **221**, jeb185884 (2018).
- 879 12. A. R. Rodan, M. Baum, C. L. Huang, The *drosophila* NKCC Ncc69 is required for  
880 normal renal tubule function. *Am. J. Physiol. - Cell Physiol.* **303**, C883–C894  
881 (2012).
- 882 13. X. H. Weng, M. Huss, H. Wieczorek, K. W. Beyenbach, The V-type H<sup>+</sup>-ATPase  
883 in Malpighian tubules of *Aedes aegypti*: localization and activity. *J. Exp. Biol.* **206**,  
884 2211–2219 (2003).
- 885 14. H. Wieczorek, K. W. Beyenbach, M. Huss, O. Vitavska, Vacuolar-type proton  
886 pumps in insect epithelia. *J. Exp. Biol.* **212**, 1611–1619 (2009).
- 887 15. H. Wieczorek, The insect V-ATPase, a plasma membrane proton pump energizing  
888 secondary active transport: molecular analysis of electrogenic potassium transport  
889 in the tobacco hornworm midgut. *J. Exp. Biol.* **172**, 335–343 (1992).
- 890 16. H. Wieczorek, M. Putzenlechner, U. Klein, A Vacuolar-type proton pump  
891 energizes K<sup>+</sup>/H<sup>+</sup> antiport in an animal plasma membrane. *J. Biol. Chem.* **266**,

- 892 15340–15347 (1991).
- 893 17. W. R. Harvey, S. H. P. Maddrell, W. H. Telfer, H. Wiczorek, H<sup>+</sup> V-ATPases  
894 energize animal plasma membranes for secretion and absorption of ions and fluids.  
895 *Am. Zool.* **38**, 426–441 (1998).
- 896 18. Y. Li, *et al.*, RNA-Seq comparison of larval and adult malpighian tubules of the  
897 yellow fever mosquito *Aedes aegypti* reveals life stage-specific changes in renal  
898 function. *Front. Physiol.* **8**, 1–13 (2017).
- 899 19. M. L. Patrick, K. Aimanova, H. R. Sanders, S. S. Gill, P-type Na<sup>+</sup>/K<sup>+</sup>-ATPase and  
900 V-type H<sup>+</sup>-ATPase expression patterns in the osmoregulatory organs of larval and  
901 adult mosquito *Aedes aegypti*. *J. Exp. Biol.* **209**, 4638–4651 (2006).
- 902 20. K. W. Beyenbach, T. L. Pannabecker, W. Nagel, Central role of the apical  
903 membrane H<sup>+</sup>-ATPase in electrogenesis and epithelial transport in Malpighian  
904 tubules. *J. Exp. Biol.* **203**, 1459–1468 (2000).
- 905 21. R. M. Hine, *et al.*, The excretion of NaCl and KCl loads in mosquitoes. *Am. J.*  
906 *Physiol. - Regul. Integr. Comp. Physiol.* **307**, R837–R849 (2014).
- 907 22. P. Dames, *et al.*, cAMP regulates plasma membrane vacuolar-type H<sup>+</sup>-ATPase  
908 assembly and activity in blowfly salivary glands. *Proc. Natl. Acad. Sci. U. S. A.*  
909 **103**, 3926–3931 (2006).
- 910 23. G. M. Coast, C. S. Garside, S. G. Webster, K. M. Schegg, D. A. Schooley,  
911 Mosquito natriuretic peptide identified as a calcitonin-like diuretic hormone in  
912 *Anopheles gambiae* (Giles). *J. Exp. Biol.* **208**, 3281–3291 (2005).



- 913 24. K. Karas, P. Brauer, D. Petzel, Actin redistribution in mosquito Malpighian  
914 tubules after a blood meal and cyclic AMP stimulation. *J. Insect Physiol.* **51**,  
915 1041–1054 (2005).
- 916 25. C. Cady, H. H. Hagedorn, Effects of putative diuretic factors on intracellular  
917 second messenger levels in the Malpighian tubules of *Aedes aegypti*. *J. Insect*  
918 *Physiol.* **45**, 327–337 (1999).
- 919 26. D. H. Petzel, P. T. Pirotte, E. Van Kerkhove, Intracellular and luminal pH  
920 measurements of malpighian tubules of the mosquito *Aedes aegypti*: the effects of  
921 cAMP. *J. Insect Physiol.* **45**, 973–982 (1999).
- 922 27. T. M. Clark, T. K. Hayes, K. W. Beyenbach, Dose-dependent effects of CRF-like  
923 diuretic peptide on transcellular and paracellular transport pathways. *Am. J.*  
924 *Physiol. - Ren. Physiol.* **274** (1998).
- 925 28. K. W. Beyenbach, H. Wiczorek, The V-type H<sup>+</sup> ATPase: molecular structure and  
926 function, physiological roles and regulation. *J. Exp. Biol.* **209**, 577–589 (2006).
- 927 29. F. J. S. Novak, *et al.*, Primary structure of V-ATPase subunit B from *Manduca*  
928 *sexta* midgut. *BBA - Gene Struct. Expr.* **1132**, 67–71 (1992).
- 929 30. Y. X. Pan, H. H. Gu, J. Xu, G. E. Dean, *Saccharomyces cerevisiae* expression of  
930 exogenous vacuolar ATPase subunits B. *BBA - Biomembr.* **1151**, 175–185 (1993).
- 931 31. H. Wiczorek, D. Brown, S. Grinstein, J. Ehrenfeld, W. R. Harvey, Animal plasma  
932 membrane energization by proton-motive V-ATPases. *BioEssays* **21**, 637–648  
933 (1999).

- 934 32. J. Zhang, Y. Feng, M. Forgac, Proton conduction and bafilomycin binding by the  
935 V0 domain of the coated vesicle V-ATPase. *J. Biol. Chem.* **269**, 23518–23523  
936 (1994).
- 937 33. W. J. A. Dschida, B. J. Bowman, The vacuolar ATPase: sulfite stabilization and  
938 the mechanism of nitrate inactivation. *J. Biol. Chem.* **270**, 1557–1563 (1995).
- 939 34. J. Rein, M. Voss, W. Blenau, B. Walz, O. Baumann, Hormone-induced assembly  
940 and activation of V-ATPase in blowfly salivary glands is mediated by protein  
941 kinase A. *Am. J. Physiol. - Cell Physiol.* **294**, C56–C65 (2008).
- 942 35. B. Zimmermann, P. Dames, B. Walz, O. Baumann, Distribution and serotonin-  
943 induced activation of vacuolar-type H<sup>+</sup>-ATPase in the salivary glands of the  
944 blowfly *Calliphora vicina*. *J. Exp. Biol.* **206**, 1867–1876 (2003).
- 945 36. H. Wiczorek, G. Grüber, W. R. Harvey, M. Huss, H. Merzendorfer, The plasma  
946 membrane H<sup>+</sup>-V-ATPase from tobacco hornworm midgut. *J. Bioenerg. Biomembr.*  
947 **31**, 67–74 (1999).
- 948 37. M. C. Quinlan, N. J. Tublitz, M. J. O'Donnell, Anti-diuresis in the blood-feeding  
949 insect *Rhodnius prolixus* Stal: The peptide CAP(2b) and cyclic GMP inhibit  
950 Malpighian tubule fluid secretion. *J. Exp. Biol.* **200**, 2363–2367 (1997).
- 951 38. F. Tiburcy, K. W. Beyenbach, H. Wiczorek, Protein kinase A-dependent and -  
952 independent activation of the V-ATPase in Malpighian tubules of *Aedes aegypti*. *J.*  
953 *Exp. Biol.* **216**, 881–891 (2013).
- 954 39. K. W. Beyenbach, P. M. Piermarini, Transcellular and paracellular pathways of

- 955 transepithelial fluid secretion in Malpighian (renal) tubules of the yellow fever  
956 mosquito *Aedes aegypti*. *Acta Physiol. (Oxf)*. **202**, 387–407 (2011).
- 957 40. K. W. Beyenbach, Energizing epithelial transport with the vacuolar H<sup>+</sup>-ATPase.  
958 *News Physiol. Sci.* **16**, 145–151 (2001).
- 959 41. T. Nishi, M. Forgac, The vacuolar (H<sup>+</sup>)-ATPases - nature's most versatile proton  
960 pumps. *Nat. Rev. Mol. Cell Biol.* **3**, 94–103 (2002).
- 961 42. N. Nelson, W. R. Harvey, Vacuolar and plasma membrane proton-  
962 adenosinetriphosphatases. *Physiol. Rev.* **79**, 361–385 (1999).
- 963 43. K. W. Beyenbach, H. Skaer, J. A. T. Dow, The developmental, molecular, and  
964 transport biology of malpighian tubules. *Annu. Rev. Entomol.* **55**, 351–374 (2010).
- 965 44. P. M. Kane, Disassembly and reassembly of the yeast vacuolar H<sup>+</sup>-ATPase in vivo.  
966 *J. Biol. Chem.* **270**, 17025–17032 (1995).
- 967 45. M. Voss, O. Vitavska, B. Walz, H. Wiczorek, O. Baumann, Stimulus-induced  
968 phosphorylation of vacuolar H<sup>+</sup>-ATPase by protein kinase A. *J. Biol. Chem.* **282**,  
969 33735–33742 (2007).
- 970 46. J. P. Sumner, *et al.*, Regulation of plasma membrane V-ATPase activity by  
971 dissociation of peripheral subunits. *J. Biol. Chem.* **270**, 5649–5653 (1995).
- 972 47. G. Coast, The endocrine control of salt balance in insects. *Gen. Comp. Endocrinol.*  
973 **152**, 332–338 (2007).
- 974 48. M. J. O'Donnell, J. H. Spring, Modes of control of insect Malpighian tubules:

- 975 synergism, antagonism, cooperation and autonomous regulation. *J. Insect Physiol.*  
976 **46**, 107–117 (2000).
- 977 49. J. C. Williams, H. H. Hagedorn, K. W. Beyenbach, Dynamic changes in flow rate  
978 and composition of urine during the post-bloodmeal diuresis in *Aedes aegypti* (L.).  
979 *J. Comp. Physiol.* **153**, 257–265 (1983).
- 980 50. C. L. Jagge, P. V. Pietrantonio, Diuretic hormone 44 receptor in Malpighian  
981 tubules of the mosquito *Aedes aegypti*: evidence for transcriptional regulation  
982 paralleling urination. *Insect Mol. Biol.* **17**, 413–426 (2008).
- 983 51. P. Gioino, B. G. Murray, J. P. Ianowski, Serotonin triggers cAMP and PKA-  
984 mediated intracellular calcium waves in Malpighian tubules of *Rhodnius prolixus*.  
985 *Am. J. Physiol. - Regul. Integr. Comp. Physiol.* **307**, R828–R836 (2014).
- 986 52. F. Sajadi, J. P. V. Paluzzi, Hormonal regulation and functional role of the ‘renal’  
987 tubules in the disease vector, *Aedes aegypti*. *Vitamins and Hormones*, (Academic  
988 Press, 2021), pp. 189–225.
- 989 53. P. V. Pietrantonio, C. Jagge, C. McDowell, Cloning and expression analysis of a  
990 5HT7-like serotonin receptor cDNA from mosquito *Aedes aegypti* female  
991 excretory and respiratory systems. *Insect Mol. Biol.* **10**, 357–369 (2001).
- 992 54. D. W. Lee, P. V. Pietrantonio, In vitro expression and pharmacology of the 5-HT7-  
993 like receptor present in the mosquito *Aedes aegypti* tracheolar cells and hindgut-  
994 associated nerves. *Insect Mol. Biol.* **12**, 561–569 (2003).
- 995 55. A. Petrova, D. F. Moffett, Comprehensive immunolocalization studies of a

- 996 putative serotonin receptor from the alimentary canal of *Aedes aegypti* larvae  
997 suggest its diverse roles in digestion and homeostasis. *PLoS One* **11**, e0146587  
998 (2016).
- 999 56. K. . Clark, T M, Hayes, T K., Holman, G.M., Beyenbach, The concentration-  
1000 dependence of CRF-like diuretic peptide: mechanisms of action. *J. Exp. Biol.* **201**,  
1001 1753–1762 (1998).
- 1002 57. D. H. Petzel, H. H. Hagedorn, K. W. Beyenbach, Preliminary isolation of  
1003 mosquito natriuretic factor. *Am. J. Physiol. - Regul. Integr. Comp. Physiol.* **18**  
1004 (1985).
- 1005 58. J. A. Dow, *et al.*, The malpighian tubules of *Drosophila melanogaster*: a novel  
1006 phenotype for studies of fluid secretion and its control. *J. Exp. Biol.* **197**, 421–428  
1007 (1994).
- 1008 59. D. H. Petzel, M. M. Berg, K. W. Beyenbach, Hormone-controlled cAMP-mediated  
1009 fluid secretion in yellow-fever mosquito. *Am. J. Physiol. - Regul. Integr. Comp.*  
1010 *Physiol.* **253** (1987).
- 1011 60. H. Kwon, H. L. Lu, M. T. Longnecker, P. V. Pietrantonio, Role in diuresis of a  
1012 calcitonin receptor (GPCRAL1) expressed in a distal-proximal gradient in renal  
1013 organs of the mosquito *Aedes aegypti* (L.). *PLoS One* **7**, e50374 (2012).
- 1014 61. W. Kang'ethe, K. G. Aimanova, A. K. Pullikuth, S. S. Gill, NHE8 mediates  
1015 amiloride-sensitive Na<sup>+</sup>/H<sup>+</sup> exchange across mosquito Malpighian tubules and  
1016 catalyzes Na<sup>+</sup> and K<sup>+</sup> transport in reconstituted proteoliposomes. *Am. J. Physiol. -*

- 1017 *Ren. Physiol.* **292**, 1501–1512 (2007).
- 1018 62. A. K. Pullikuth, K. Aimanova, W. Kang’ethe, H. R. Sanders, S. S. Gill, Molecular  
1019 characterization of sodium/proton exchanger 3 (NHE3) from the yellow fever  
1020 vector, *Aedes aegypti*. *J. Exp. Biol.* **209**, 3529–3544 (2006).
- 1021 63. P. M. Piermarini, D. Weihrauch, H. Meyer, M. Huss, K. W. Beyenbach, NHE8 is  
1022 an intracellular cation/H<sup>+</sup> exchanger in renal tubules of the yellow fever mosquito  
1023 *Aedes aegypti*. *Am. J. Physiol. - Ren. Physiol.* **296**, 730–750 (2009).
- 1024 64. H. Merzendorfer, M. Huss, R. Schmid, W. R. Harvey, H. Wiczorek, A novel  
1025 insect V-ATPase subunit M9.7 is glycosylated extensively. *J. Biol. Chem.* **274**,  
1026 17372–17378 (1999).
- 1027 65. M. C. Quinlan, M. J. O’Donnell, Anti-diuresis in the blood-feeding insect  
1028 *Rhodnius prolixus* Stal: antagonistic actions of cAMP and cGMP and the role of  
1029 organic acid transport. *J. Insect Physiol.* **44**, 561–568 (1998).
- 1030 66. S. Seino, T. Shibasaki, PKA-dependent and PKA-independent pathways for  
1031 cAMP-regulated exocytosis. *Physiol. Rev.* **85**, 1303–1342 (2005).
- 1032 67. M. Efetova, *et al.*, Separate roles of PKA and EPAC in renal function unraveled by  
1033 the optogenetic control of cAMP levels in vivo. *J. Cell Sci.* **126**, 778–788 (2013).
- 1034 68. K. W. Beyenbach, A. Oviedo, D. J. Aneshansley, Malpighian tubules of *Aedes*  
1035 *aegypti*: five tubules, one function. *J. Insect Physiol.* **39**, 639–648 (1993).
- 1036 69. J. A. Veenstra, Effects of 5-hydroxytryptamine on the Malpighian tubules of *Aedes*  
1037 *aegypti*. *J. Insect Physiol.* **34**, 299–304 (1988).

- 1038 70. J. P. V. Paluzzi, W. Naikhwah, M. J. O'Donnell, Natriuresis and diuretic  
1039 hormone synergism in *R. prolixus* upper Malpighian tubules is inhibited by the  
1040 anti-diuretic hormone, *RhoprCAPA-α2*. *J. Insect Physiol.* **58**, 534–542 (2012).
- 1041 71. D. A. Rocco, D. H. Kim, J. P. V. Paluzzi, Immunohistochemical mapping and  
1042 transcript expression of the GPA2/GPB5 receptor in tissues of the adult mosquito,  
1043 *Aedes aegypti*. *Cell Tissue Res.* **369**, 313–330 (2017).
- 1044 72. A. Lajevardi, F. Sajadi, A. Donini, J. P. V. Paluzzi, Studying the activity of  
1045 neuropeptides and other regulators of the excretory system in the adult mosquito.  
1046 *J. Vis. Exp.* **2021** (2021).
- 1047 73. M. Vanderveken, M. J. O'Donnell, Effects of diuretic hormone 31, *drosokinin*, and  
1048 allatostatin A on transepithelial K<sup>+</sup> transport and contraction frequency in the  
1049 midgut and hindgut of larval *Drosophila melanogaster*. *Arch. Insect Biochem.*  
1050 *Physiol.* **85**, 76–93 (2014).
- 1051 74. T. M. Clark, T. J. Bradley, Additive effects of 5-HT and diuretic peptide on *Aedes*  
1052 malpighian tubule fluid secretion. *Comp. Biochem. Physiol. - A Mol. Integr.*  
1053 *Physiol.* **119**, 599–605 (1998).
- 1054 75. V. Te Brugge, J. P. Paluzzi, D. A. Schooley, I. Orchard, Identification of the  
1055 elusive peptidergic diuretic hormone in the blood-feeding bug *Rhodnius prolixus*: a  
1056 CRF-related peptide. *J. Exp. Biol.* **214**, 371–381 (2011).
- 1057 76. H. R. Lee, M. Zandawala, A. B. Lange, I. Orchard, Isolation and characterization  
1058 of the corticotropin-releasing factor-related diuretic hormone receptor in *Rhodnius*

- 1059            *prolixus*. *Cell. Signal.* **28**, 1152–1162 (2016).
- 1060    77.    M. R. Rheault, M. J. O'Donnell, Organic cation transport by Malpighian tubules of  
1061            *Drosophila melanogaster*: application of two novel electrophysiological methods.  
1062            *J. Exp. Biol.* **207**, 2173–2184 (2004).
- 1063    78.    S. Jonusaite, S. P. Kelly, A. Donini, The physiological response of larval  
1064            *Chironomus riparius* (Meigen) to abrupt brackish water exposure. *J. Comp.*  
1065            *Physiol. B Biochem. Syst. Environ. Physiol.* **181**, 343–352 (2011).
- 1066    79.    S. D. McCormick, Methods for nonlethal gill biopsy and measurement of Na<sup>+</sup>, K<sup>+</sup>-  
1067            ATPase activity. *Can. J. Fish. Aquat. Sci.* **50**, 656–658 (1993).
- 1068    80.    A. J. Fosang, R. J. Colbran, Transparency is the key to quality. *J. Biol. Chem.* **290**,  
1069            29692–29694 (2015).
- 1070    81.    T. A. J. Butler, J. W. Paul, E. C. Chan, R. Smith, J. M. Tolosa, Misleading  
1071            westerns: common quantification mistakes in western blot densitometry and  
1072            proposed corrective measures. *Biomed Res. Int.* **2019** (2019).
- 1073    82.    A. C. Durant, A. Donini, Ammonium transporter expression in sperm of the  
1074            disease vector *Aedes aegypti* mosquito influences male fertility. *Proc. Natl. Acad.*  
1075            *Sci. U. S. A.* **117**, 29712–29719 (2020).
- 1076    83.    L. Misyura, E. G. Guardian, A. C. Durant, A. Donini, A comparison of aquaporin  
1077            expression in mosquito larvae (*Aedes aegypti*) that develop in hypo-osmotic  
1078            freshwater and iso-osmotic brackish water. *PLoS One* **15**, e0234892 (2020).
- 1079    84.    H. Chasiotis, S. P. Kelly, Occludin immunolocalization and protein expression in



- 1080 goldfish. *J. Exp. Biol.* **211**, 1524–1534 (2008).
- 1081 85. L. Kean, *et al.*, Two nitridergic peptides are encoded by the gene capability in  
1082 *Drosophila melanogaster*. *Am. J. Physiol. - Regul. Integr. Comp. Physiol.* **282**  
1083 (2002).
- 1084

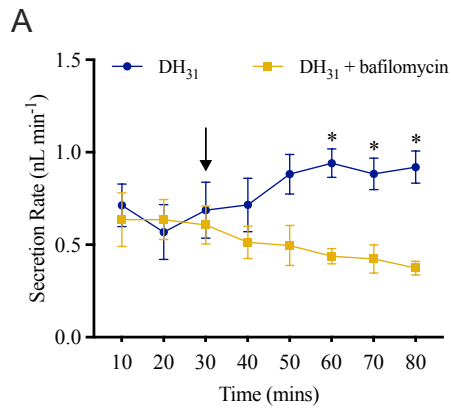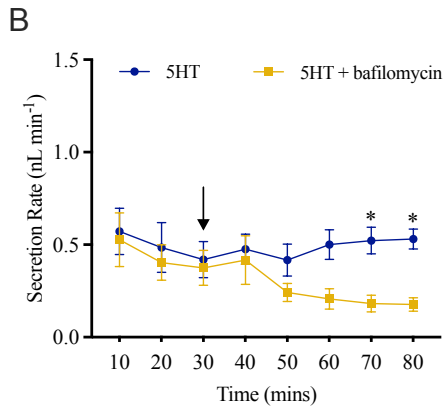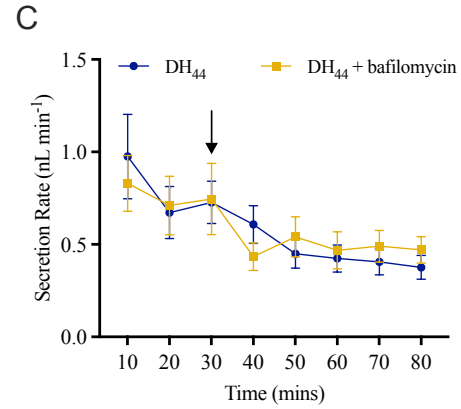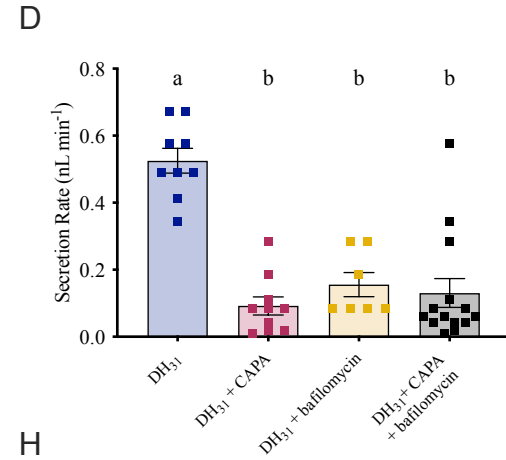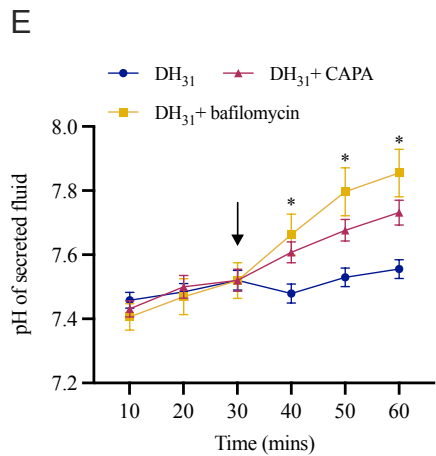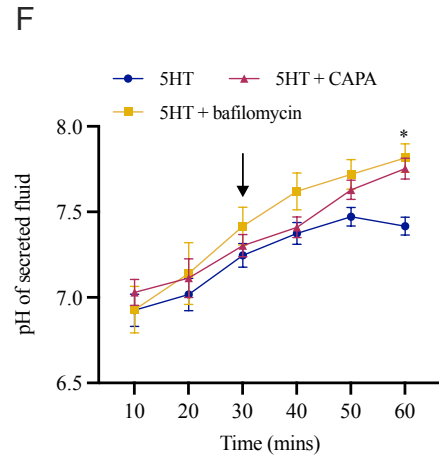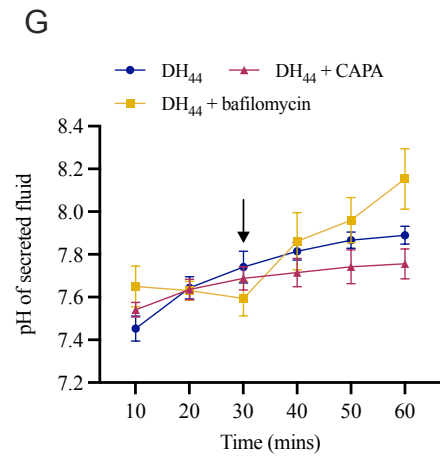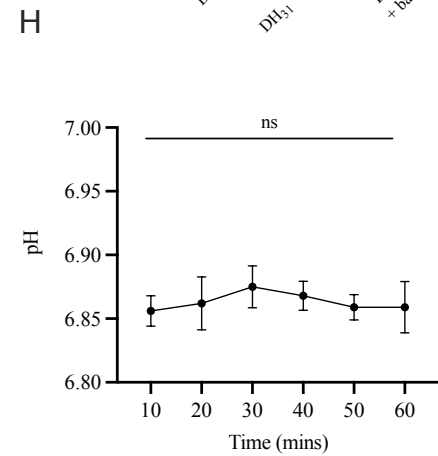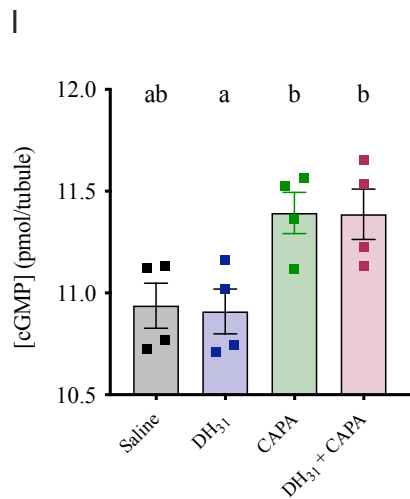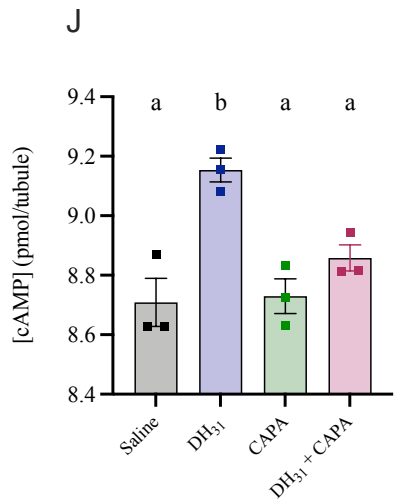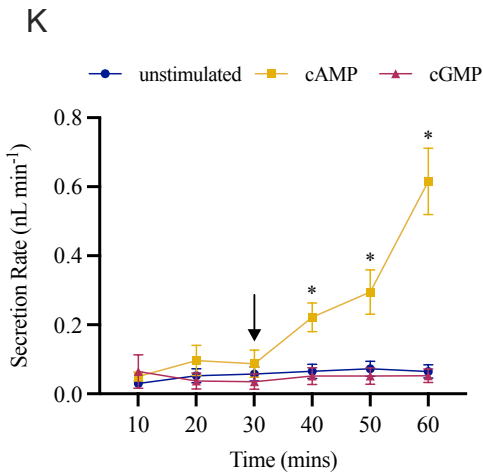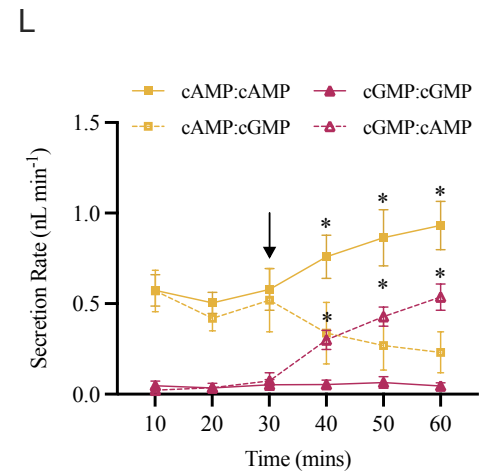

A

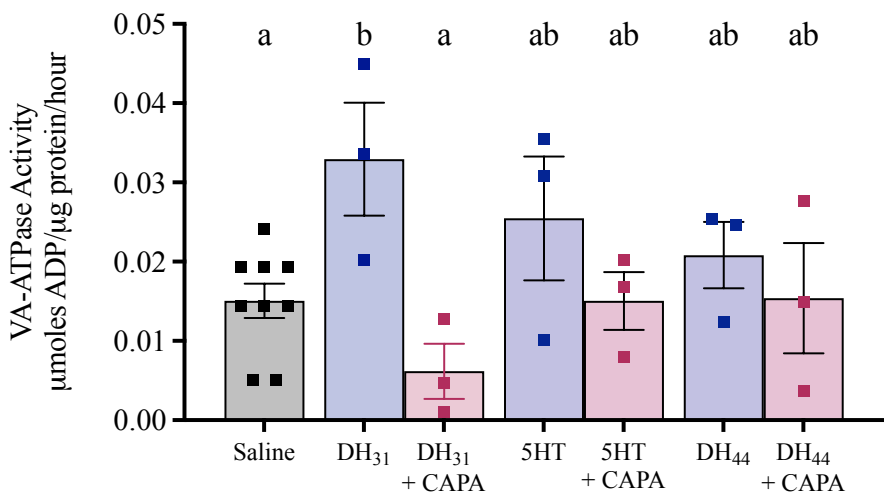

B

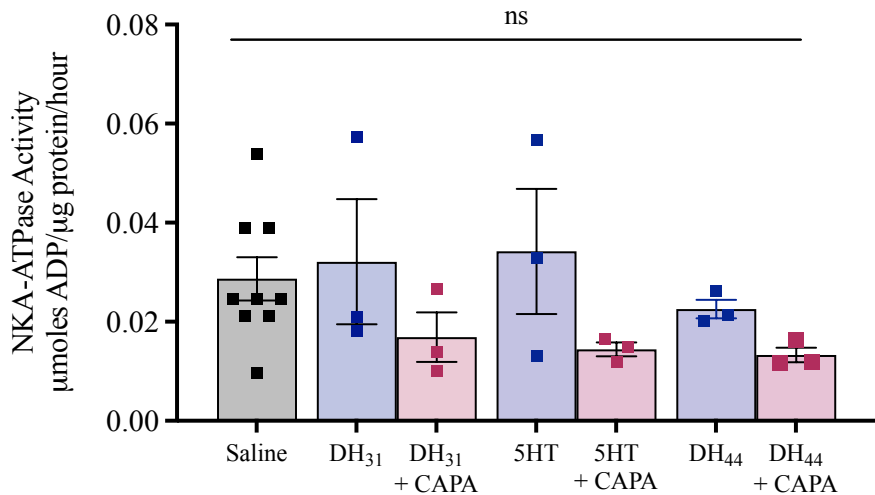

C

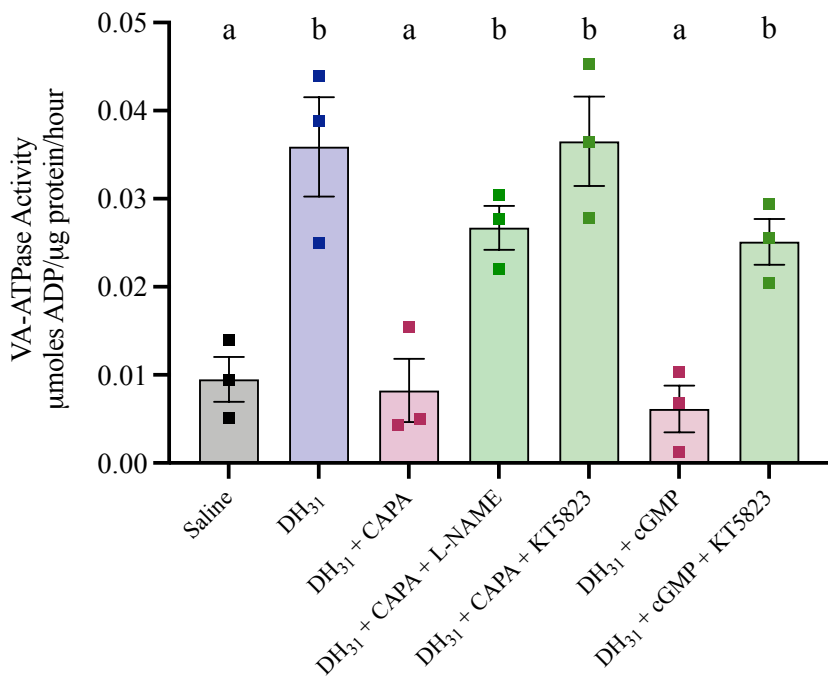

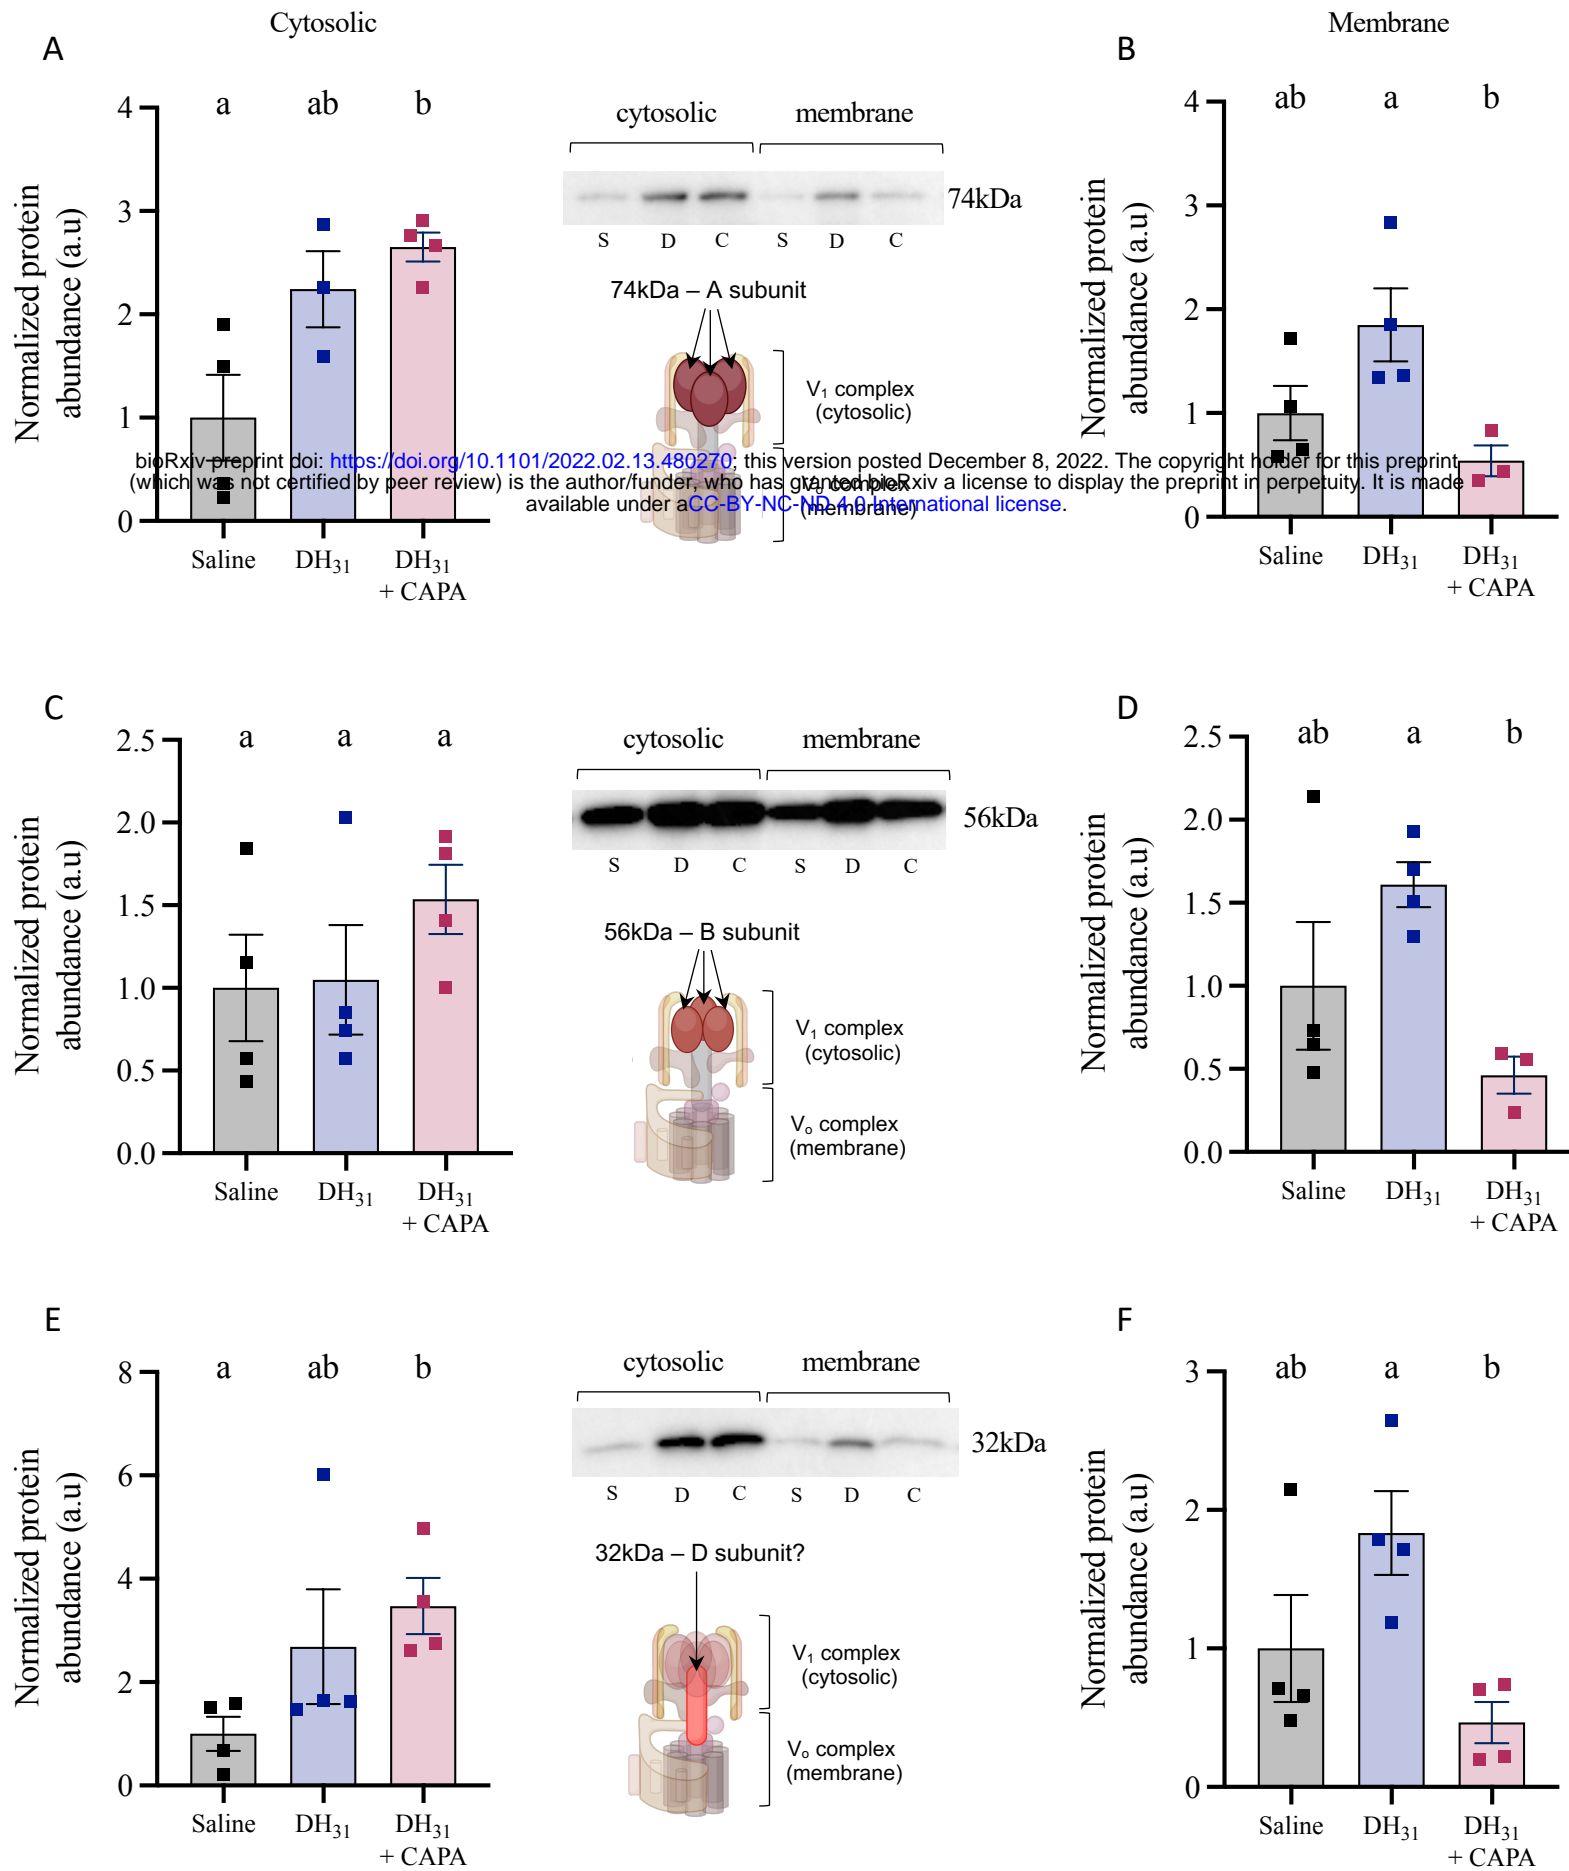

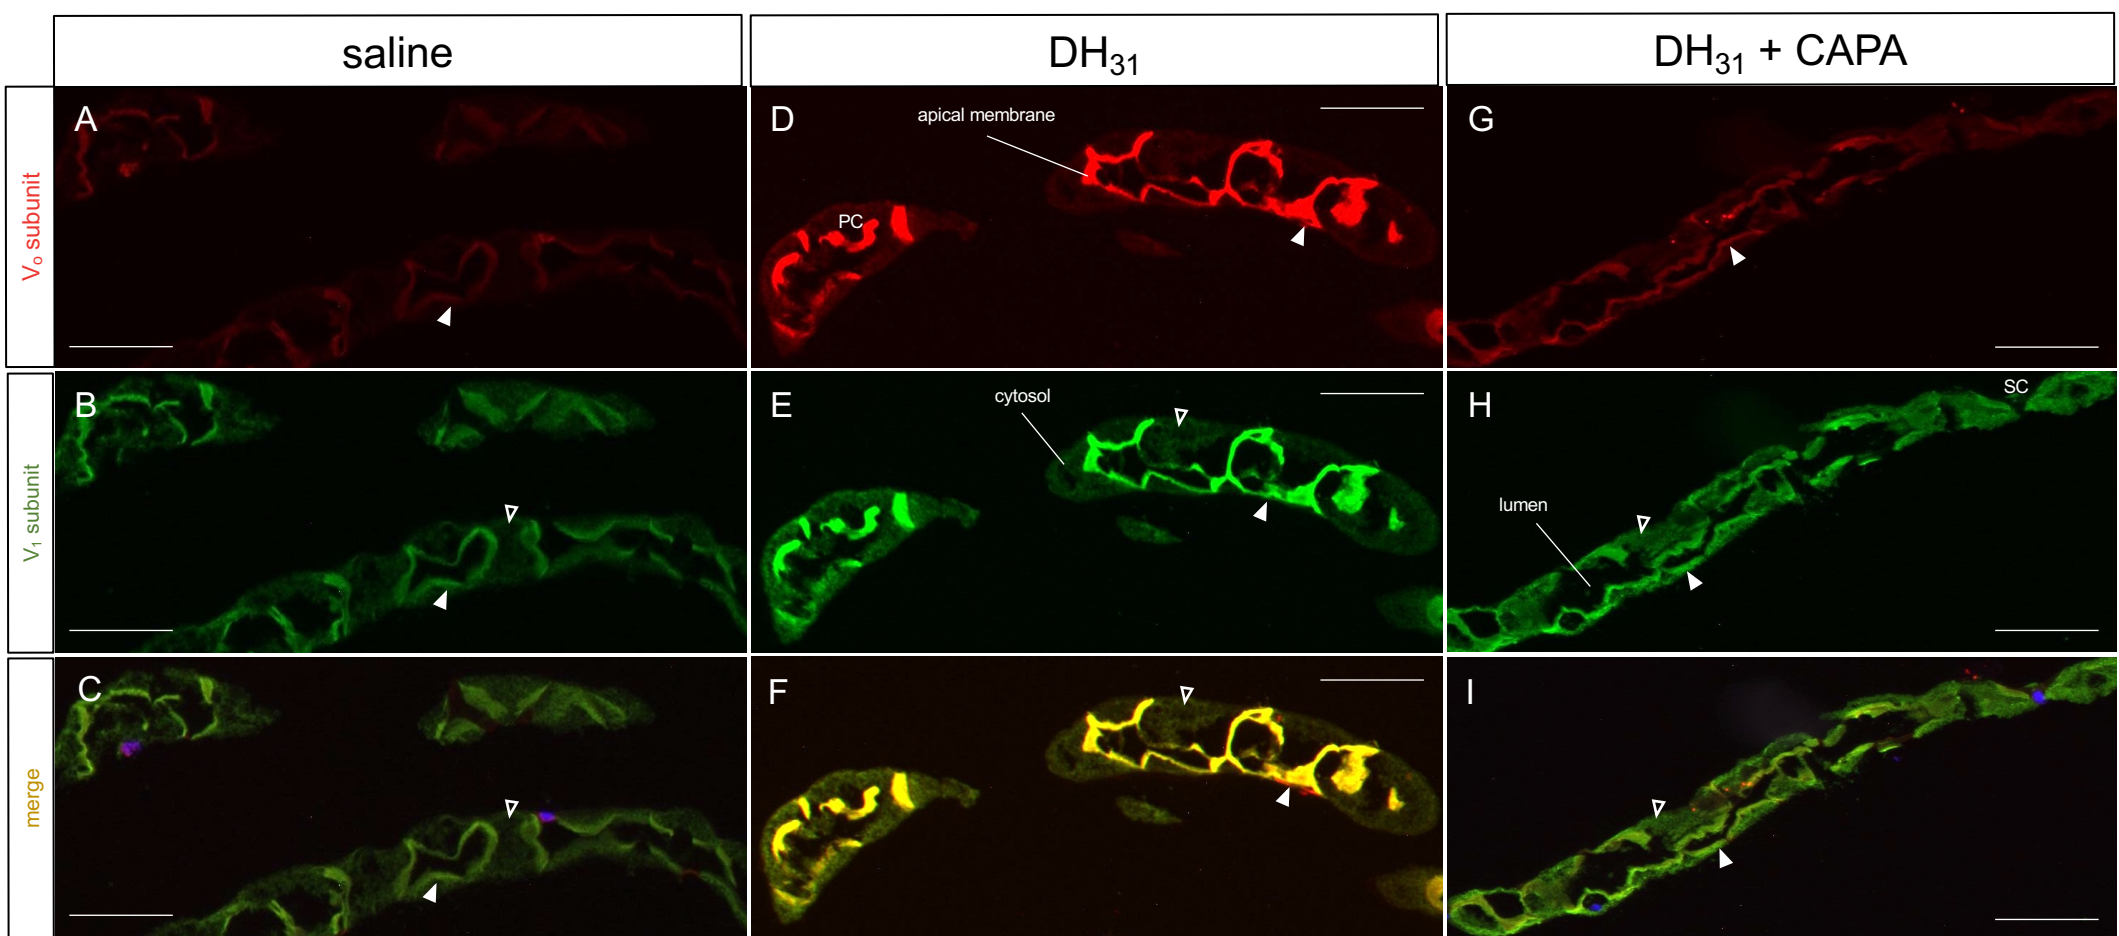

Non-fed

10min PBF

30min PBF

3hr PBF

$V_0$  subunit

A

D

G

J

apical membrane

$V_1$  subunit

B

E

H

K

cytosol

Merge

C

F

I

L

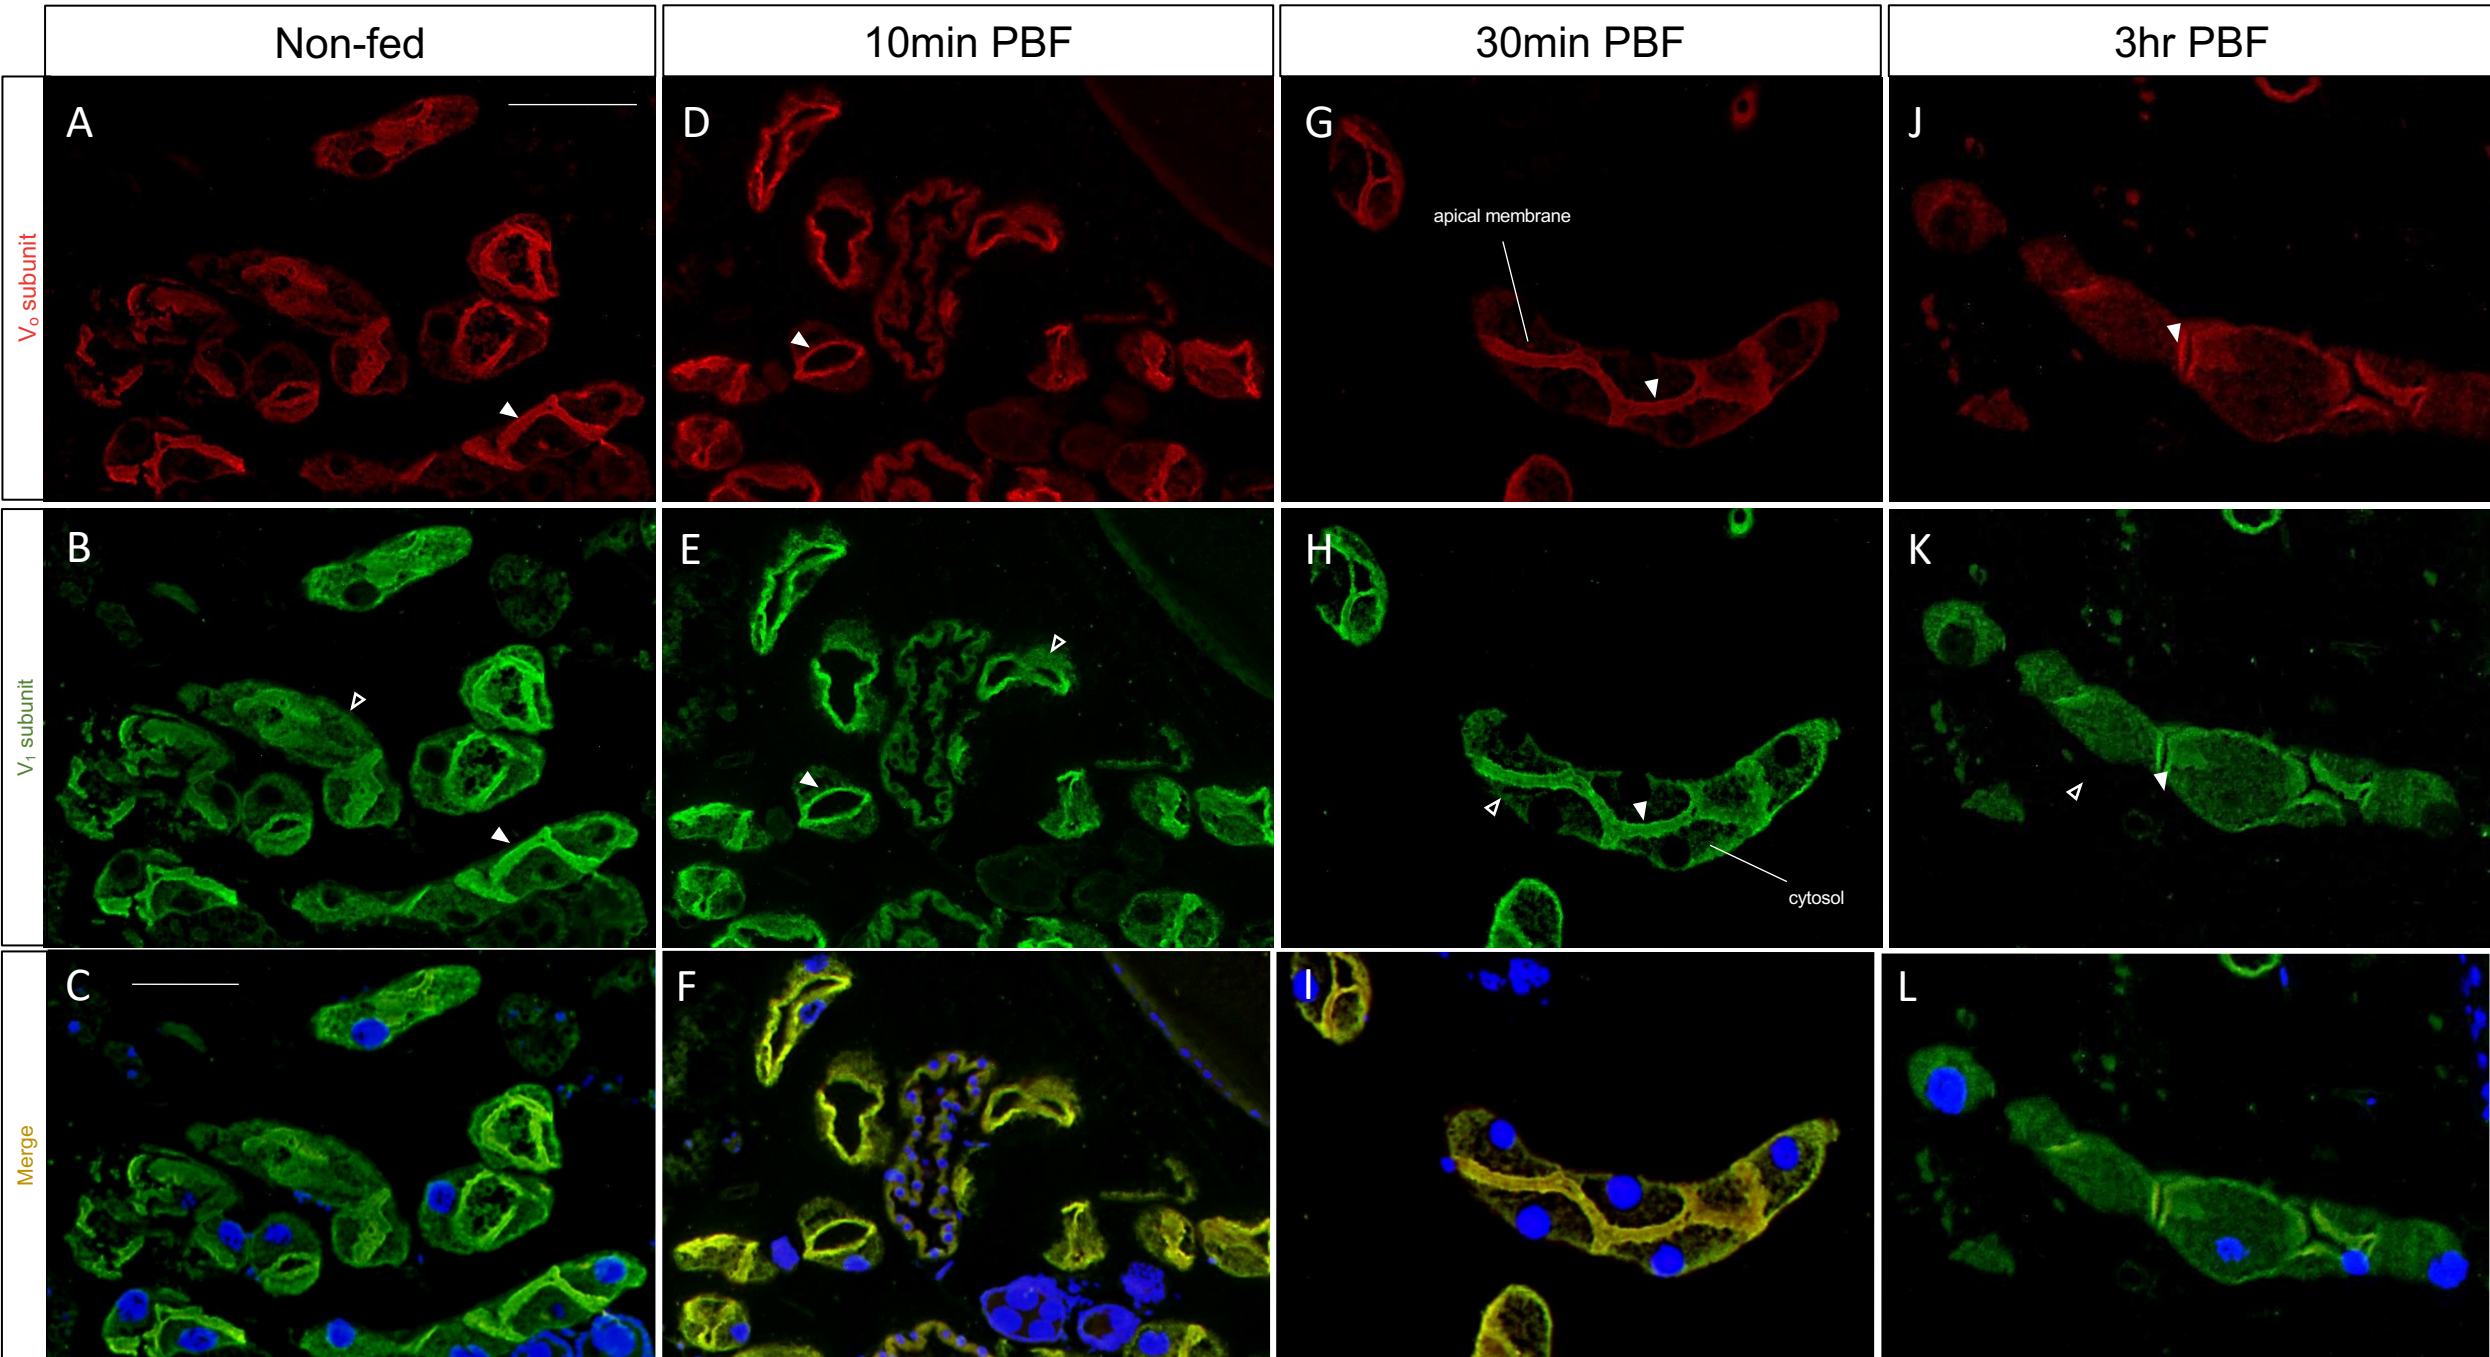

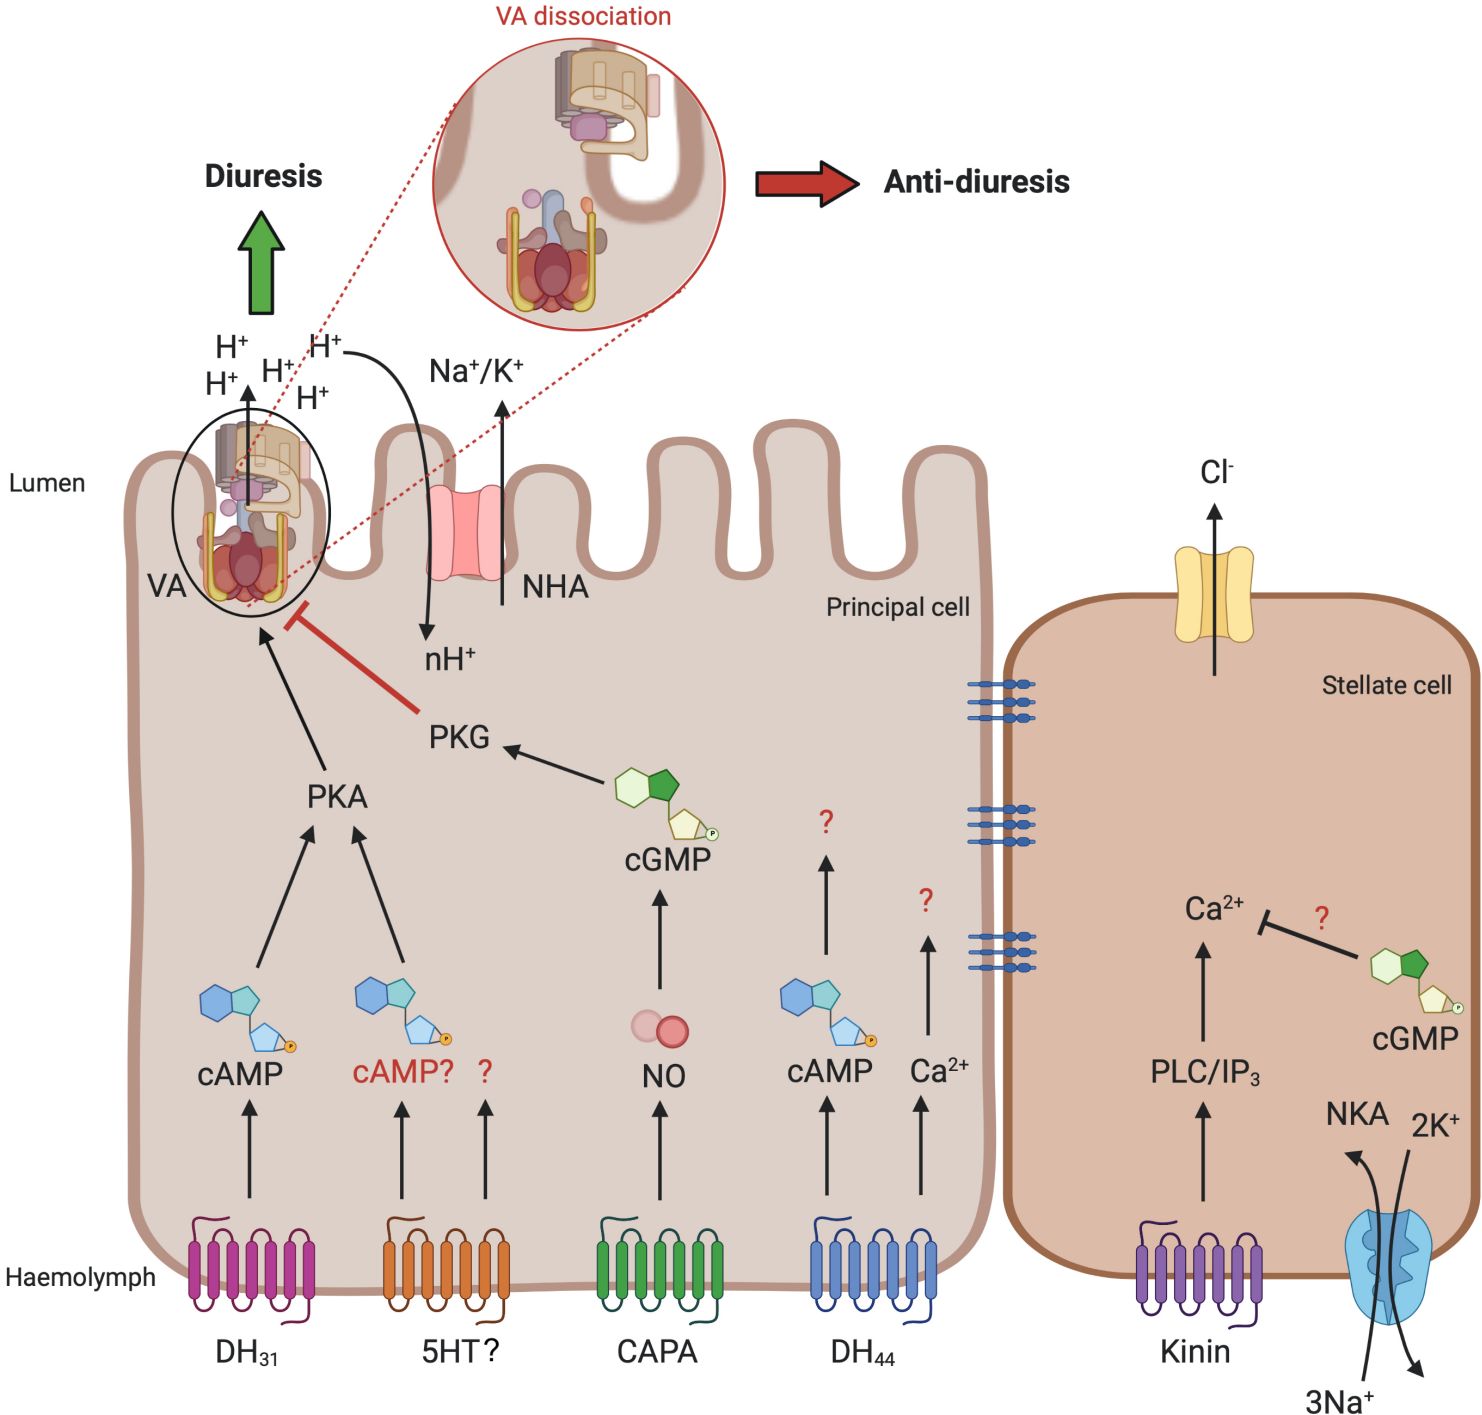

Source: https://www.biorxiv.org/content/10.1101/2022.02.13.480270v3.full.pdf
